# Supplementary material for: 40 Ar/ 39 Ar age constraints on the formation of fluid-rich quartz veins from the NW Rhenohercynian zone (Rursee area, Germany)
Source: Copernicus journal article supplement (doi:10.5194/gchron-2024-35), 2025-01-09

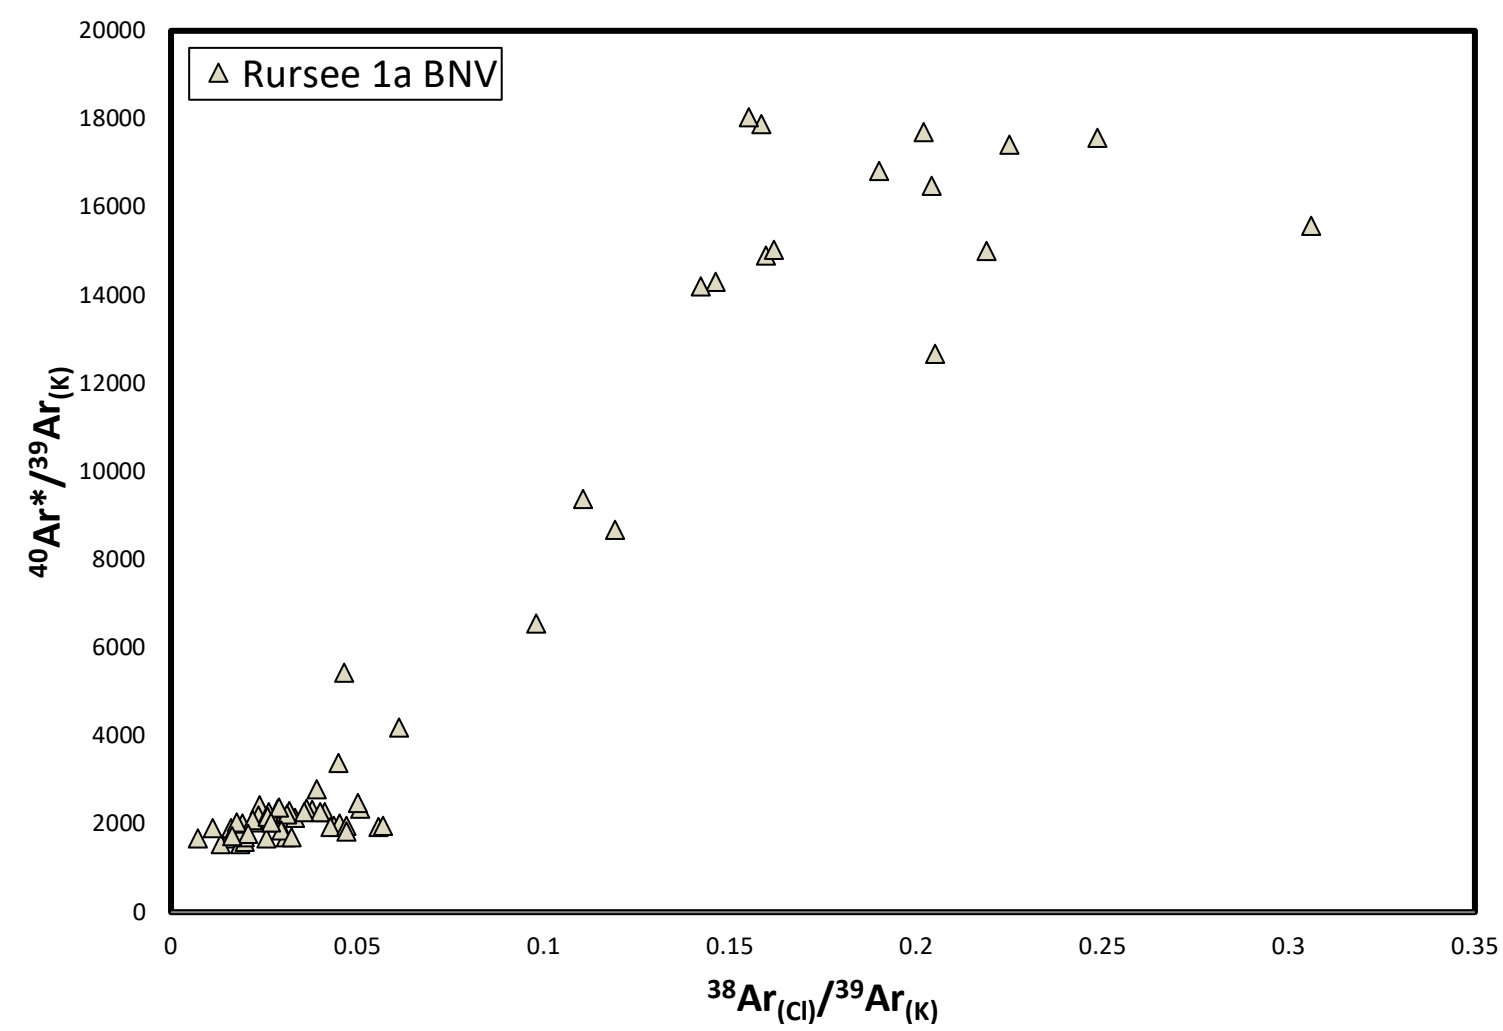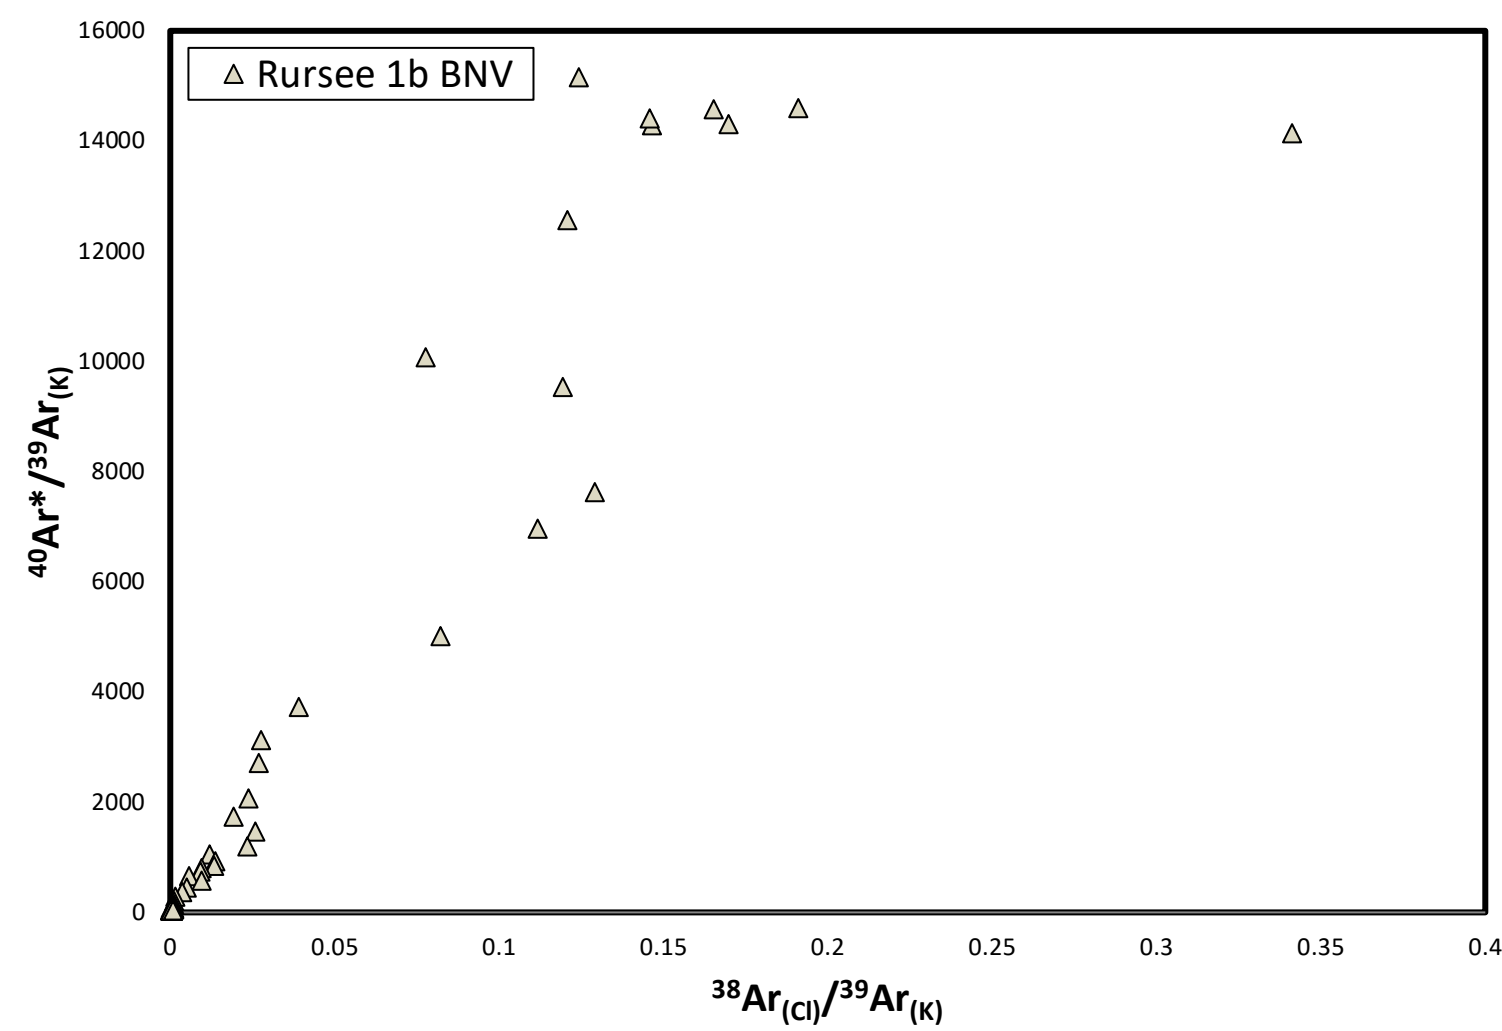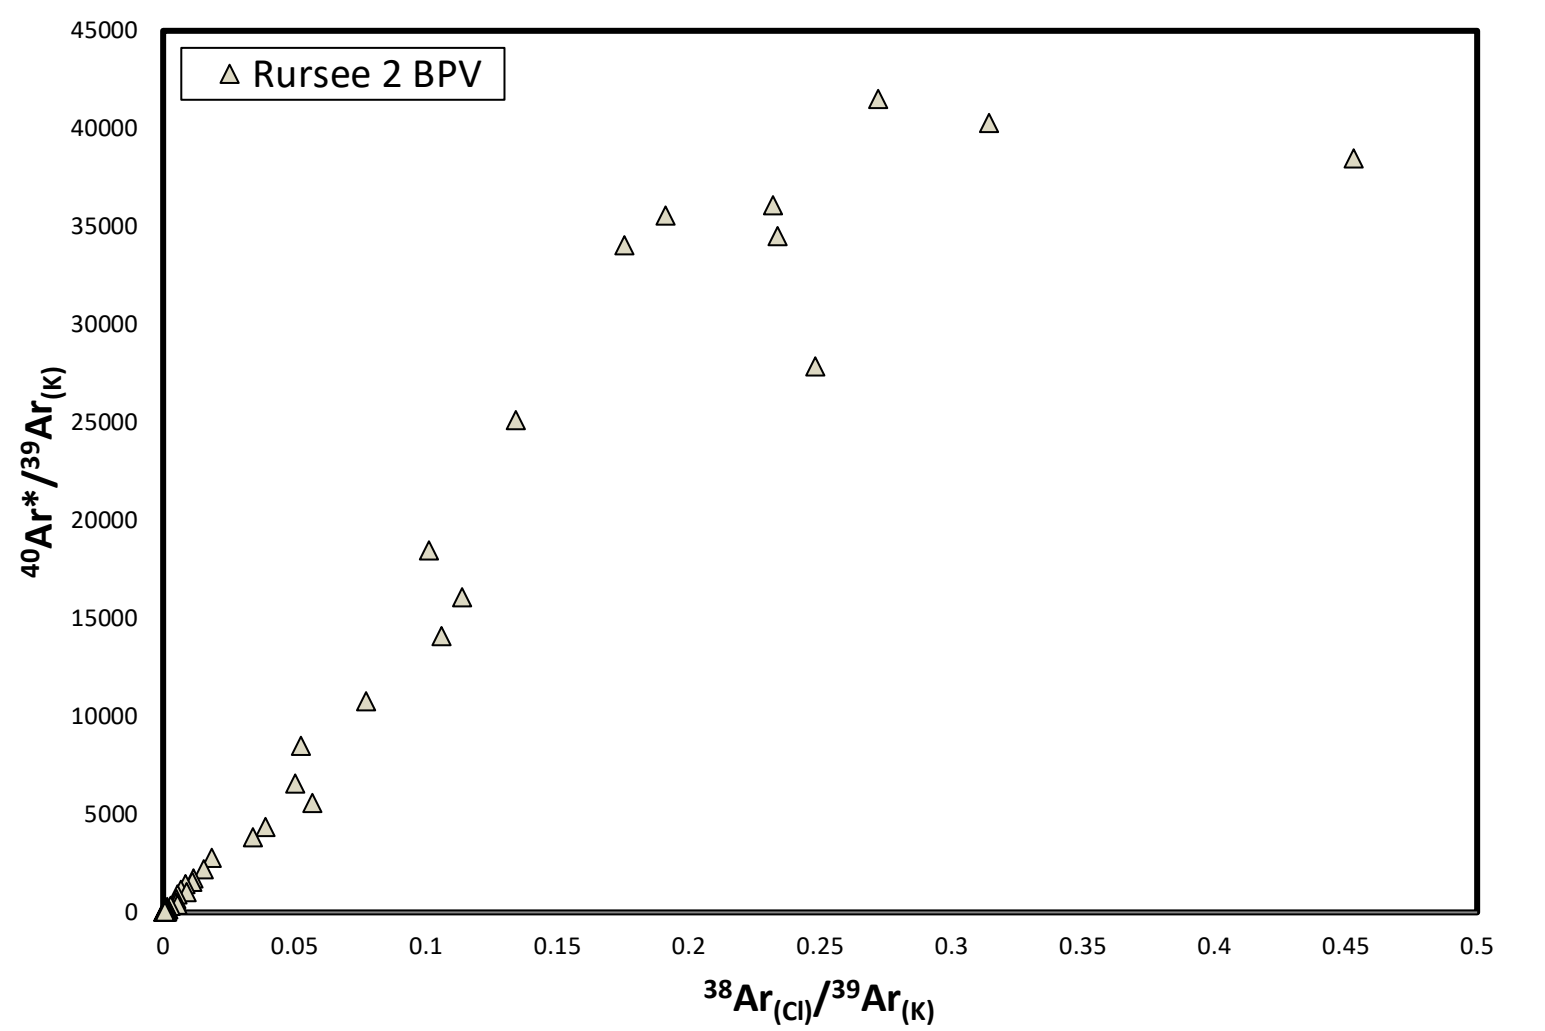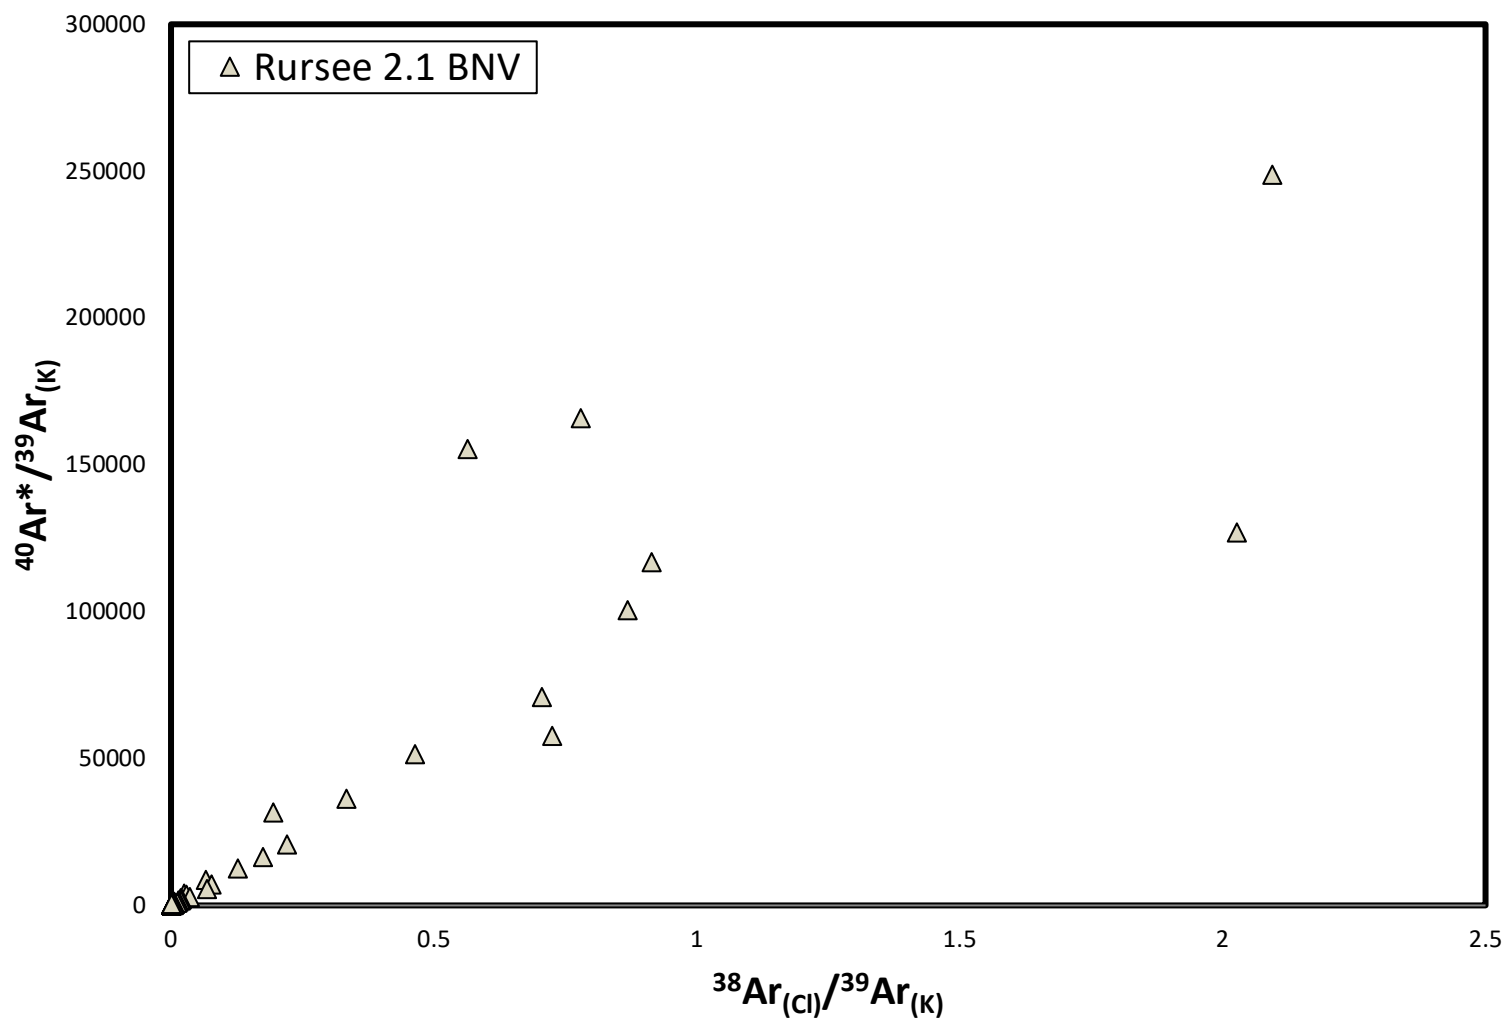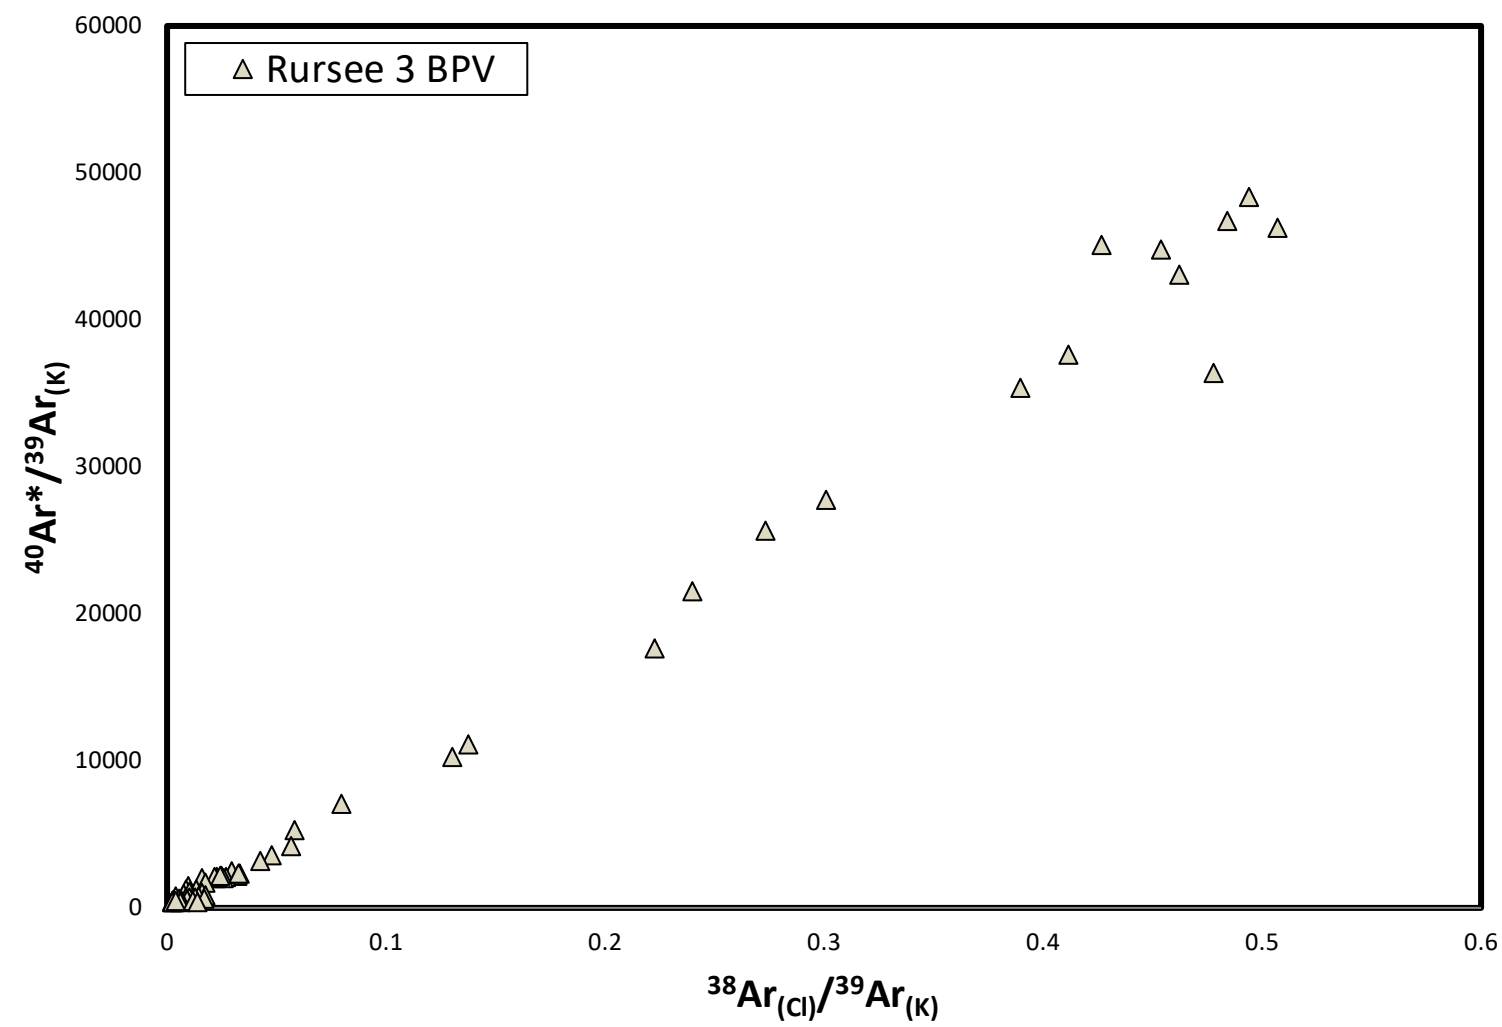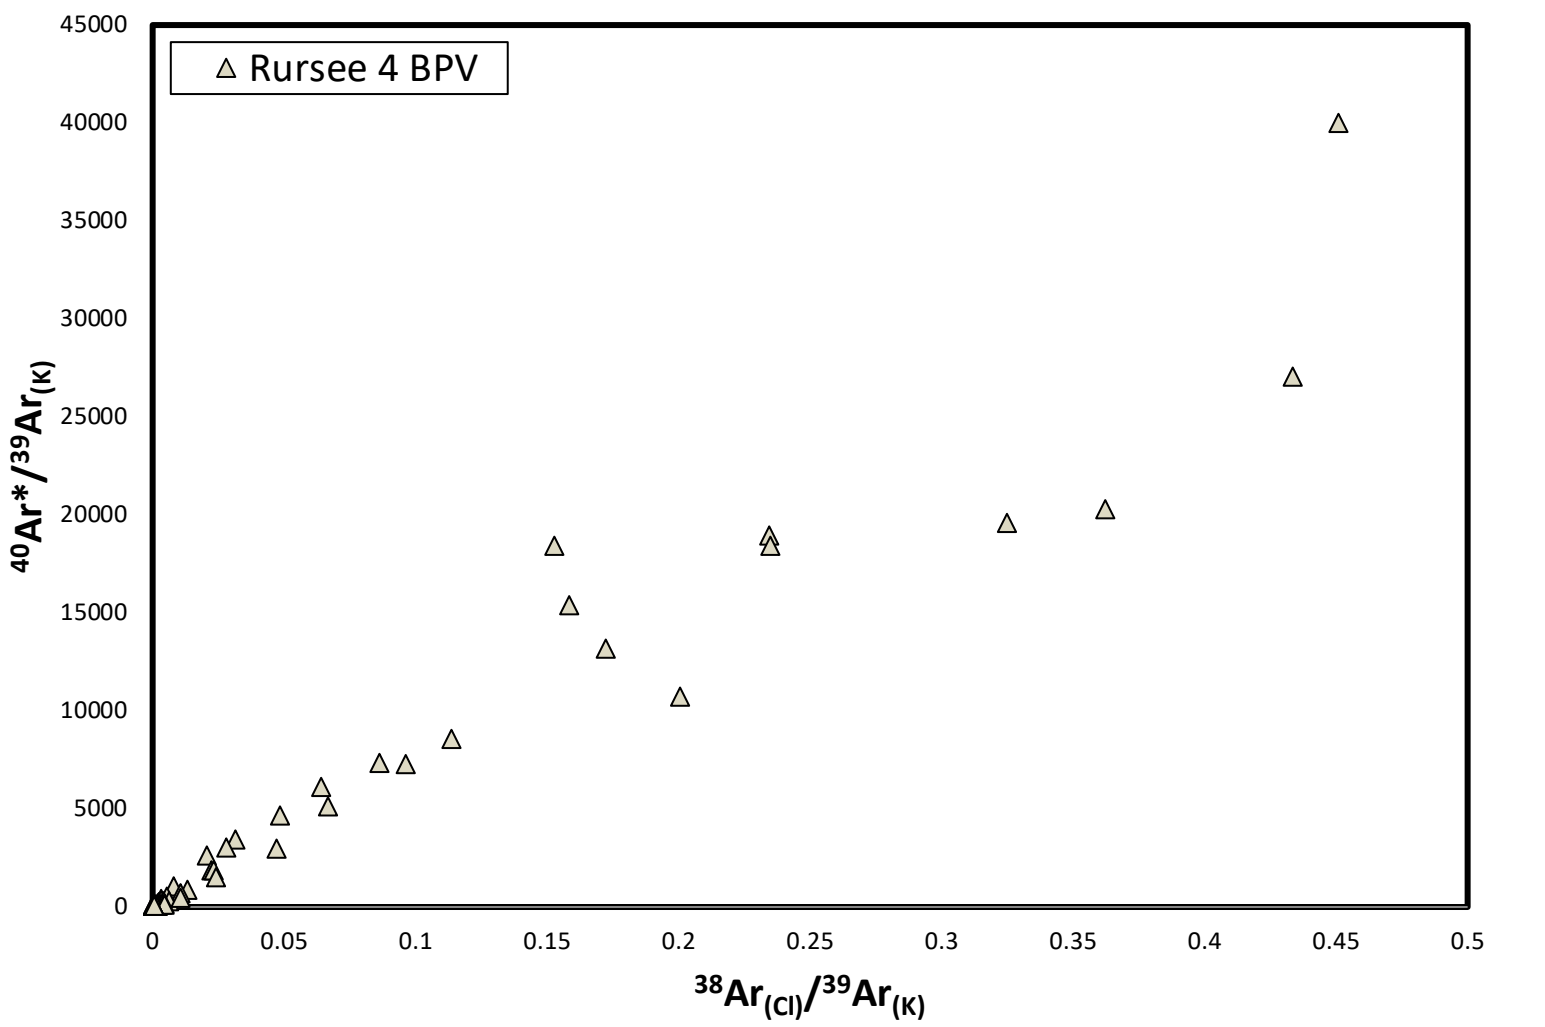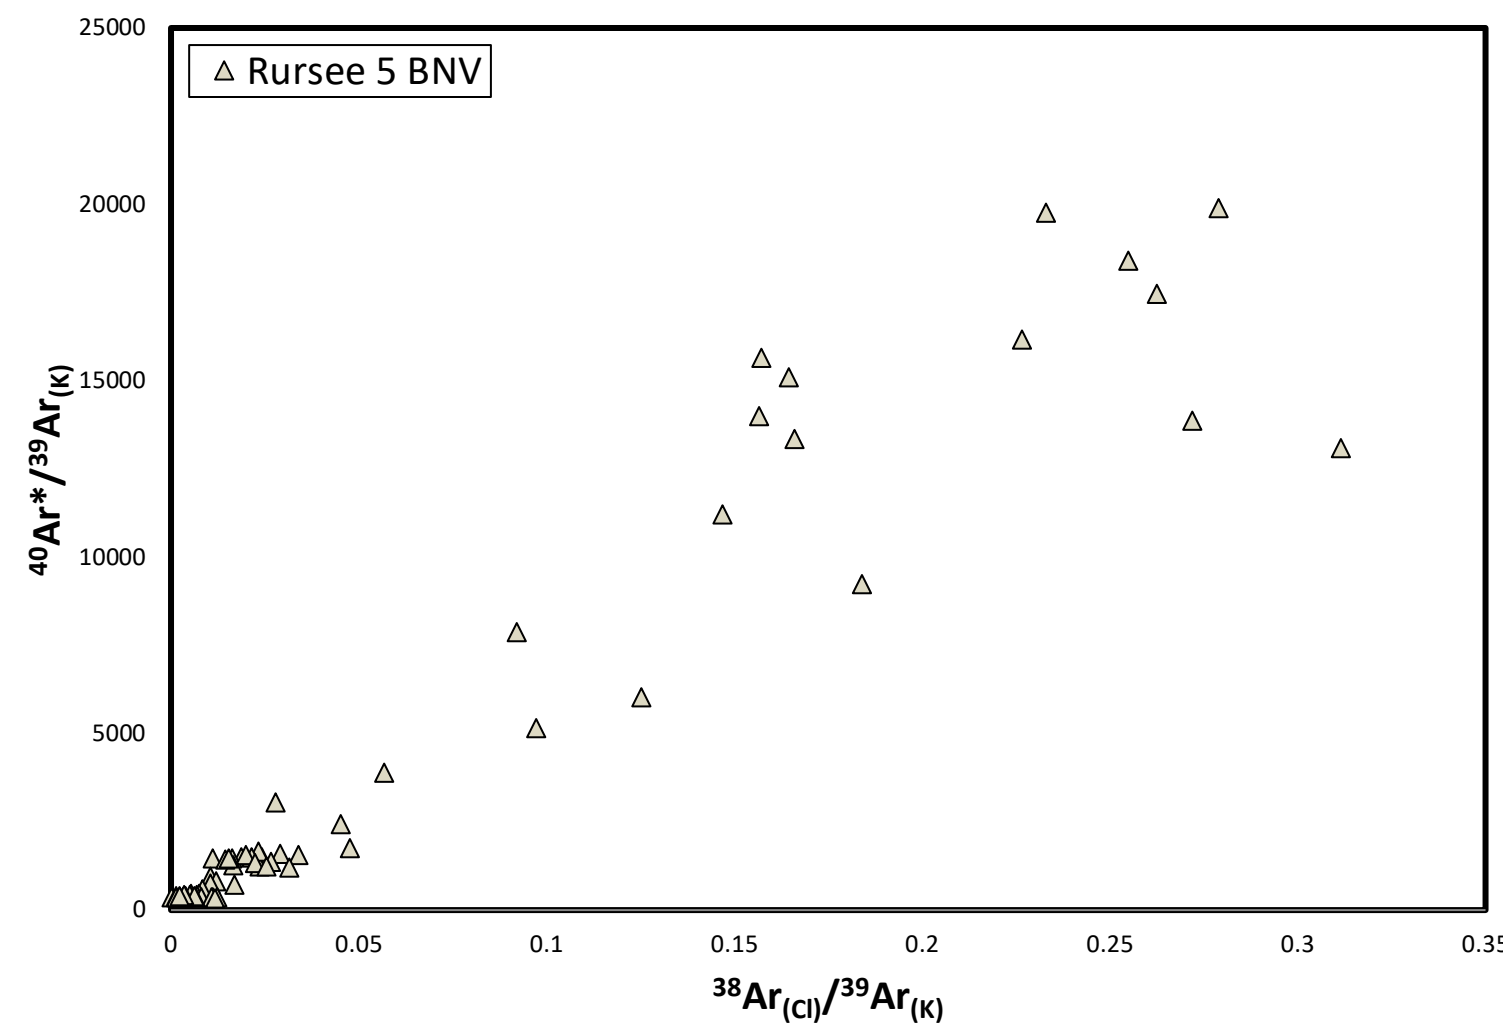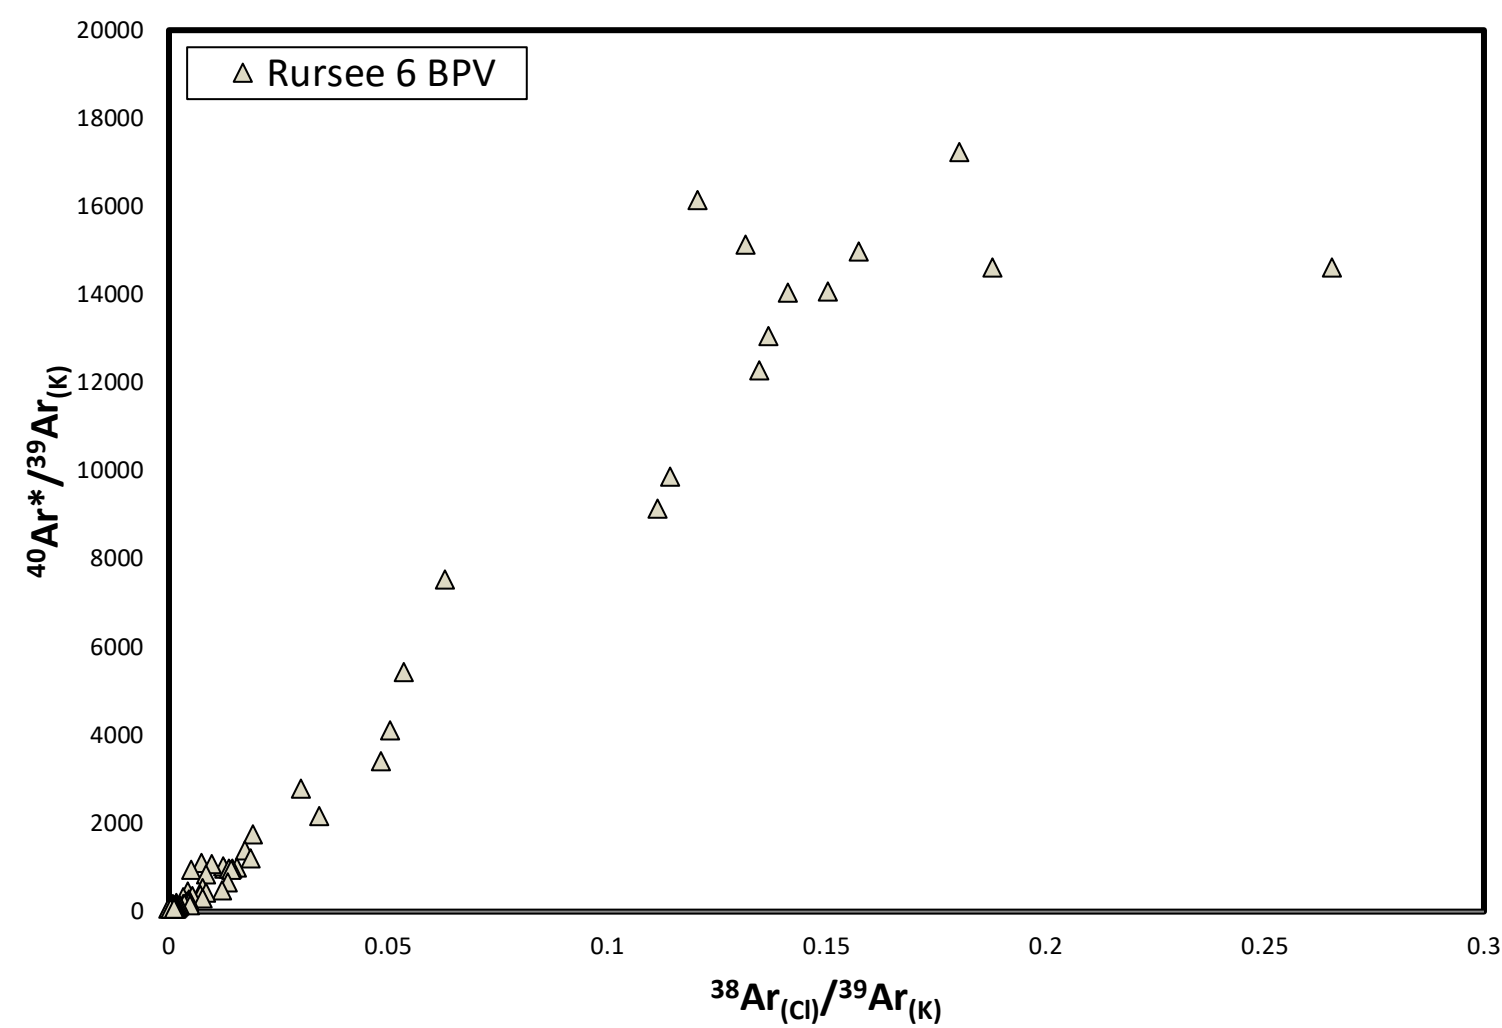

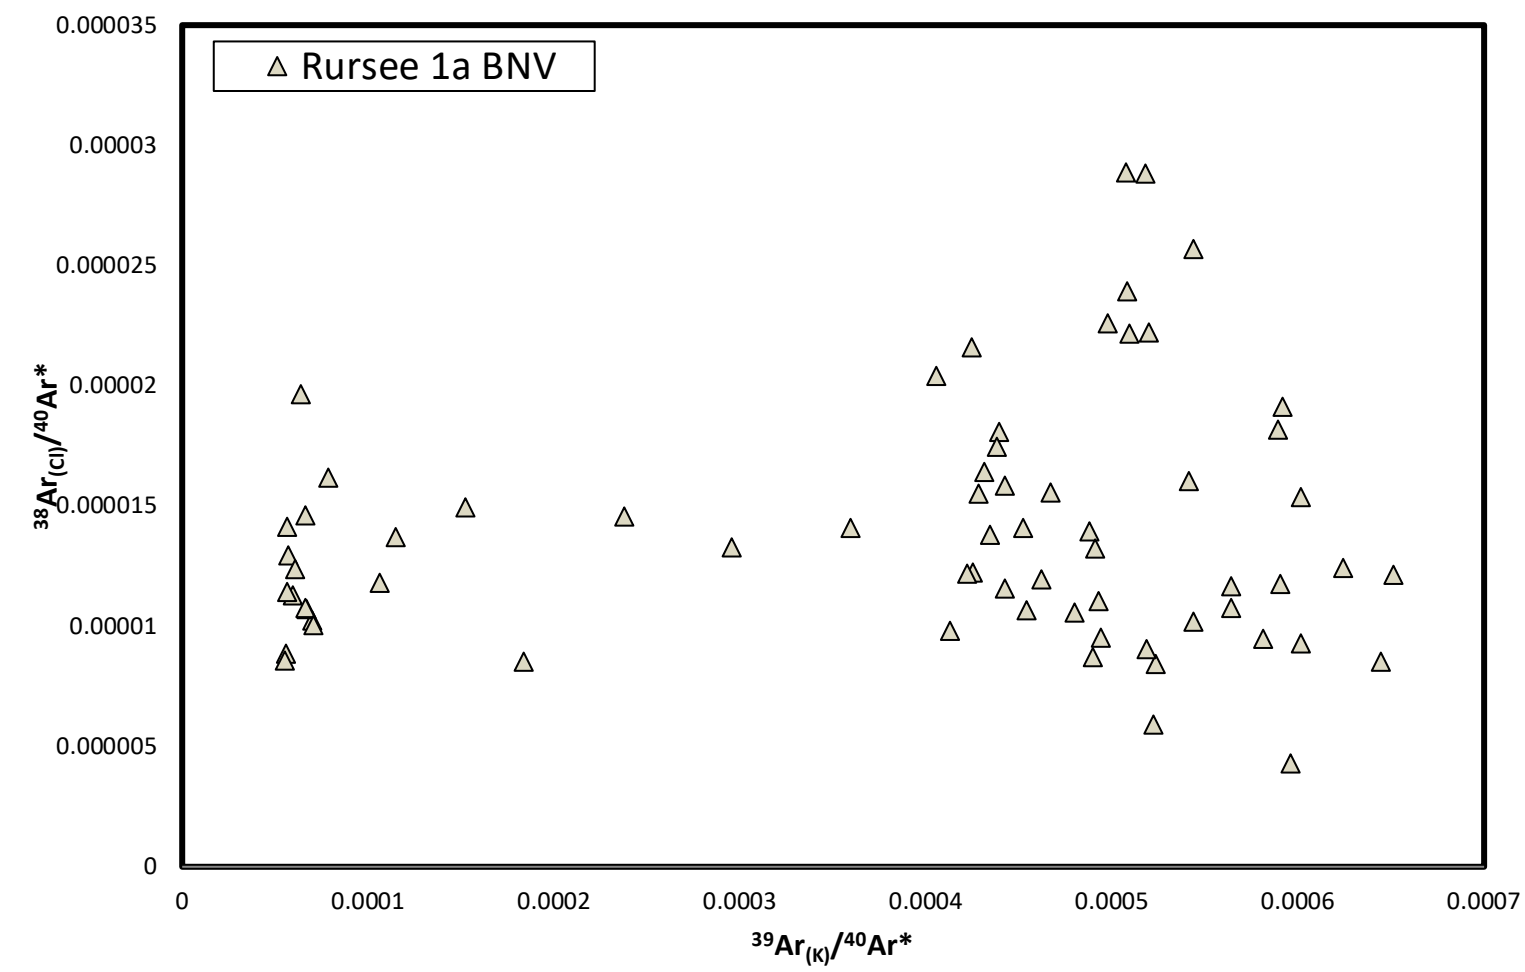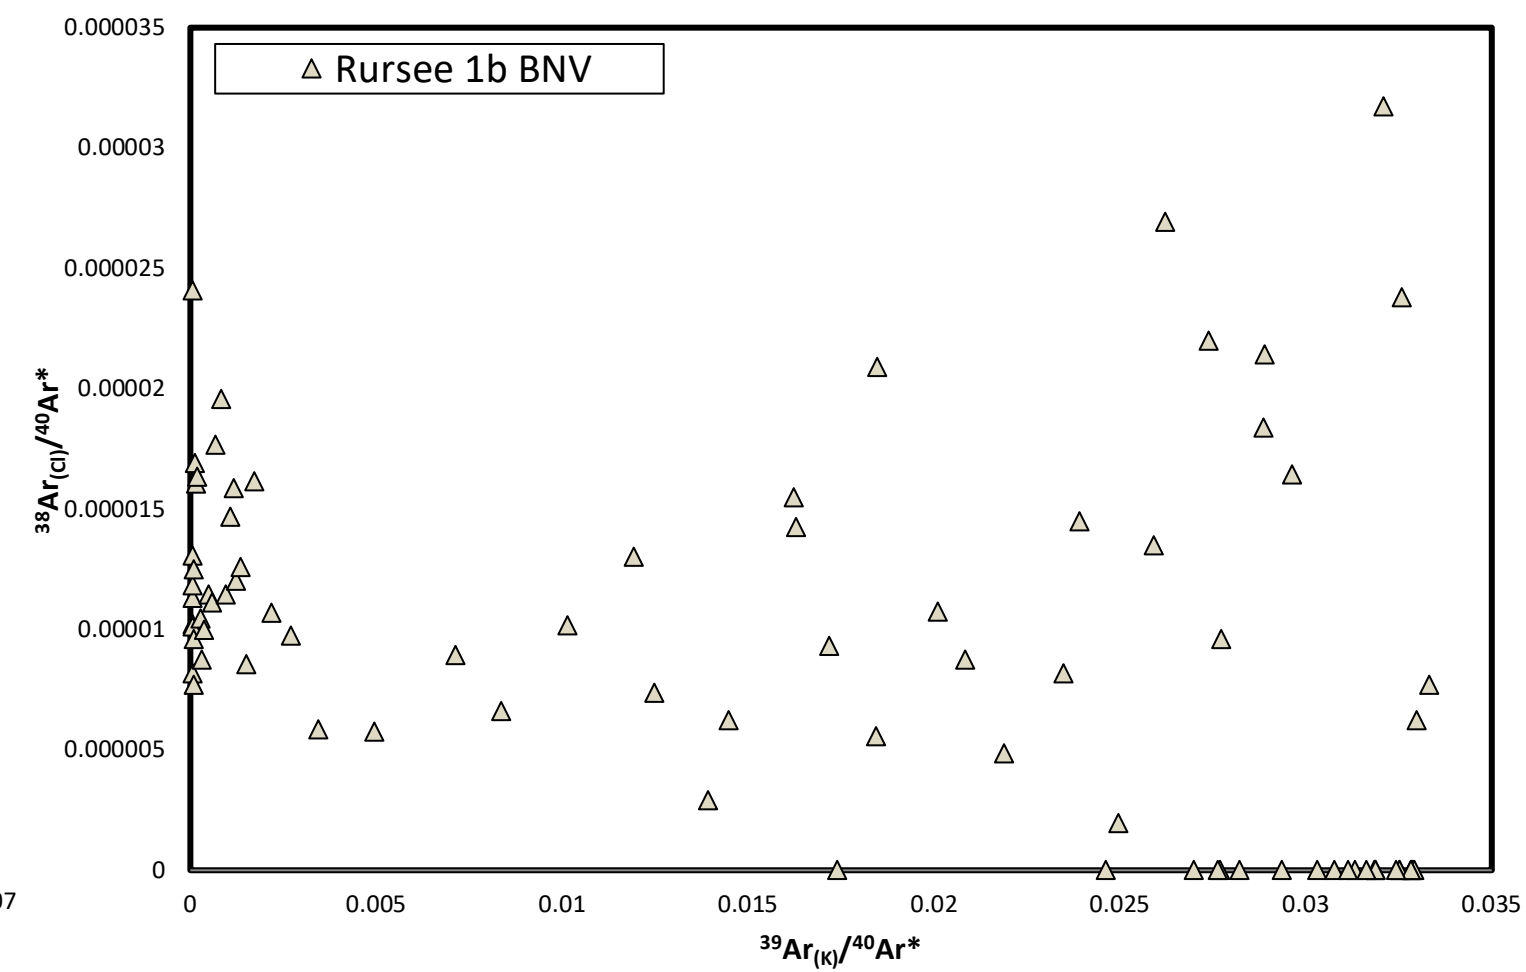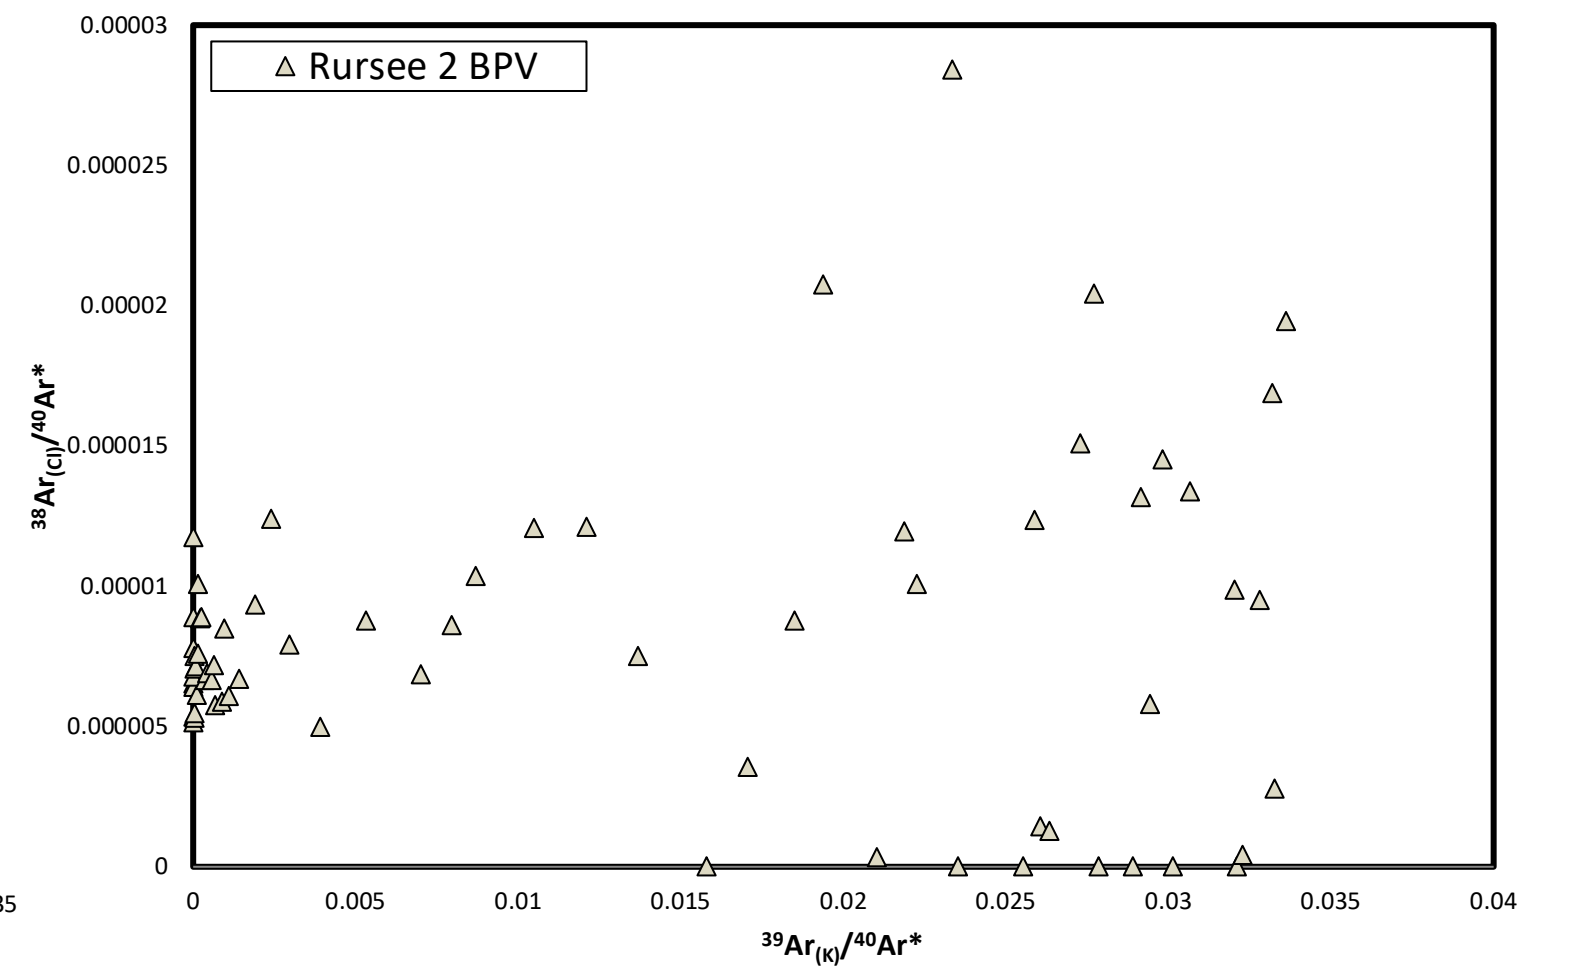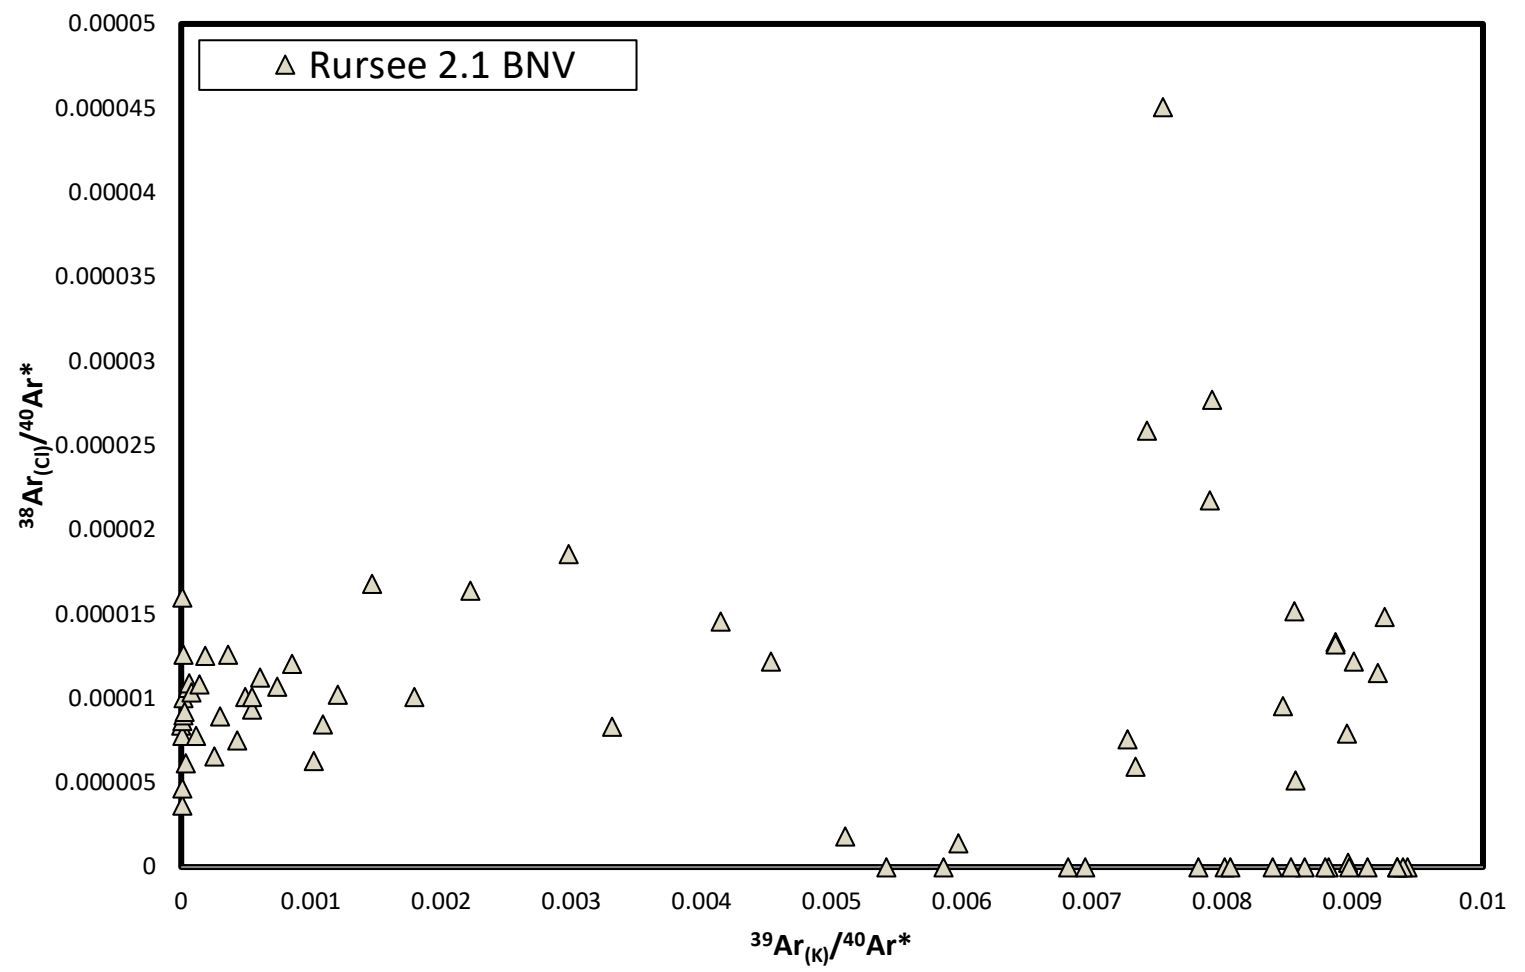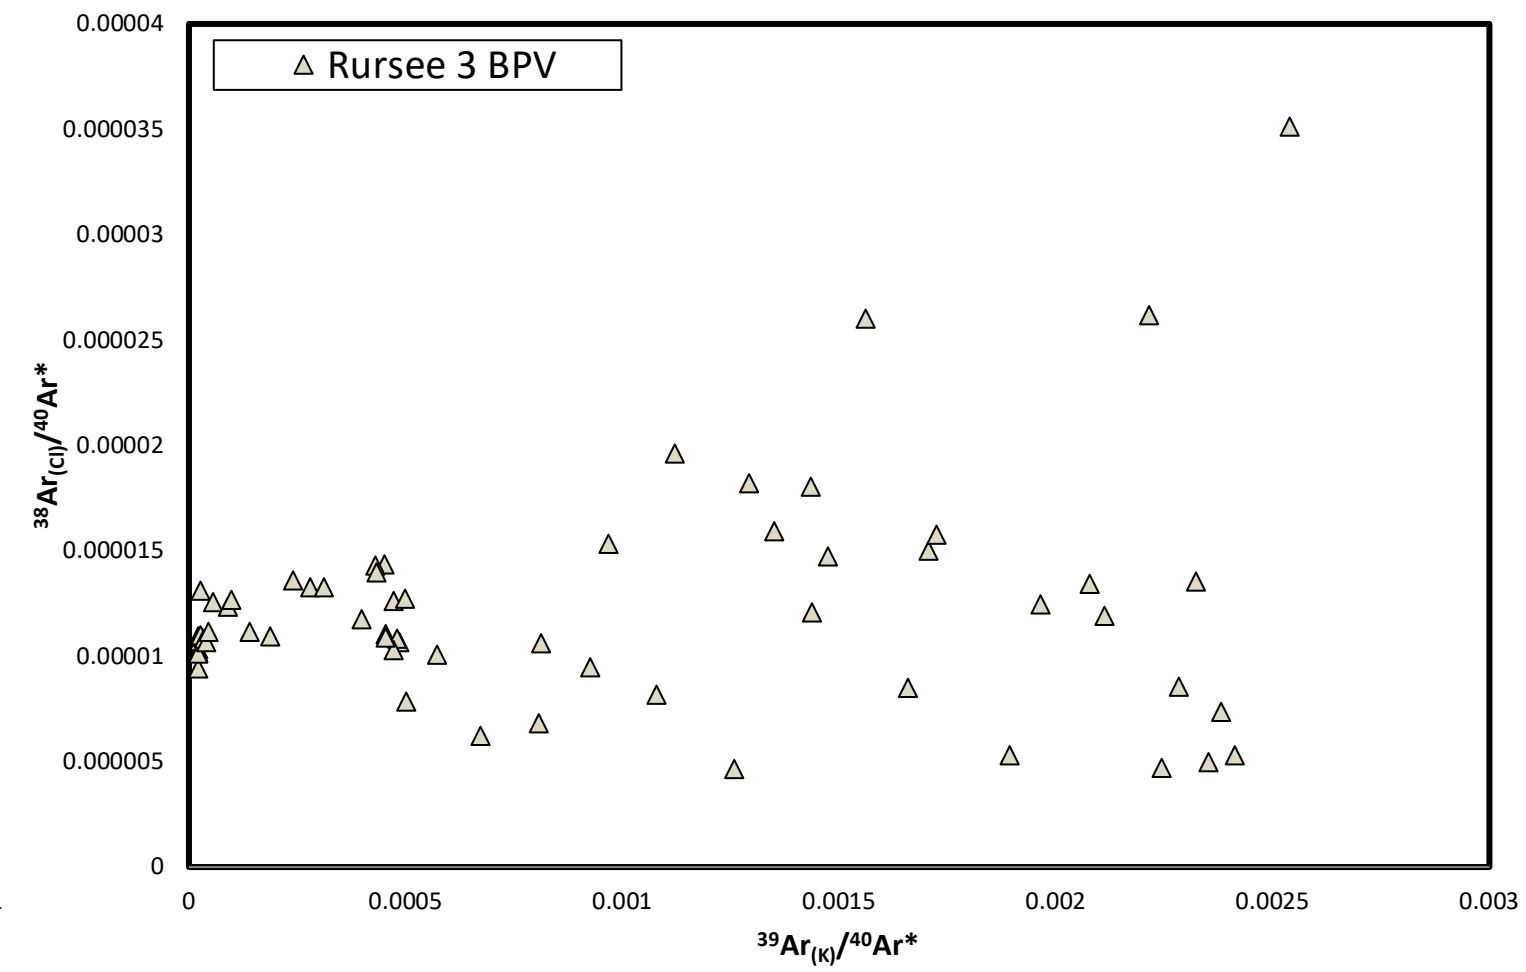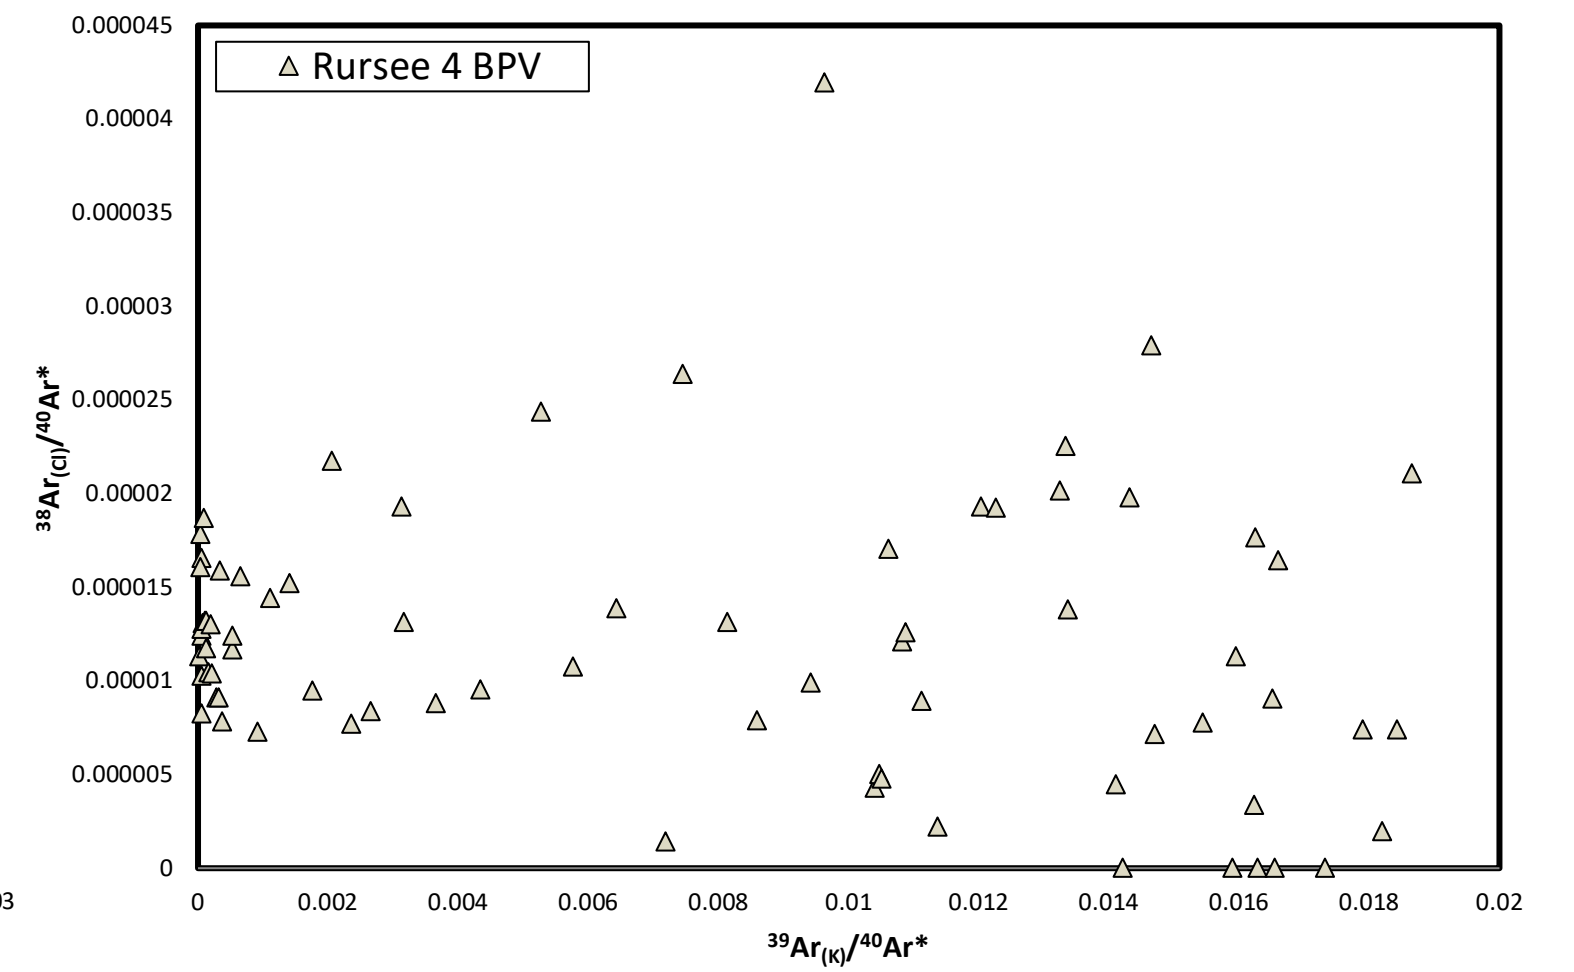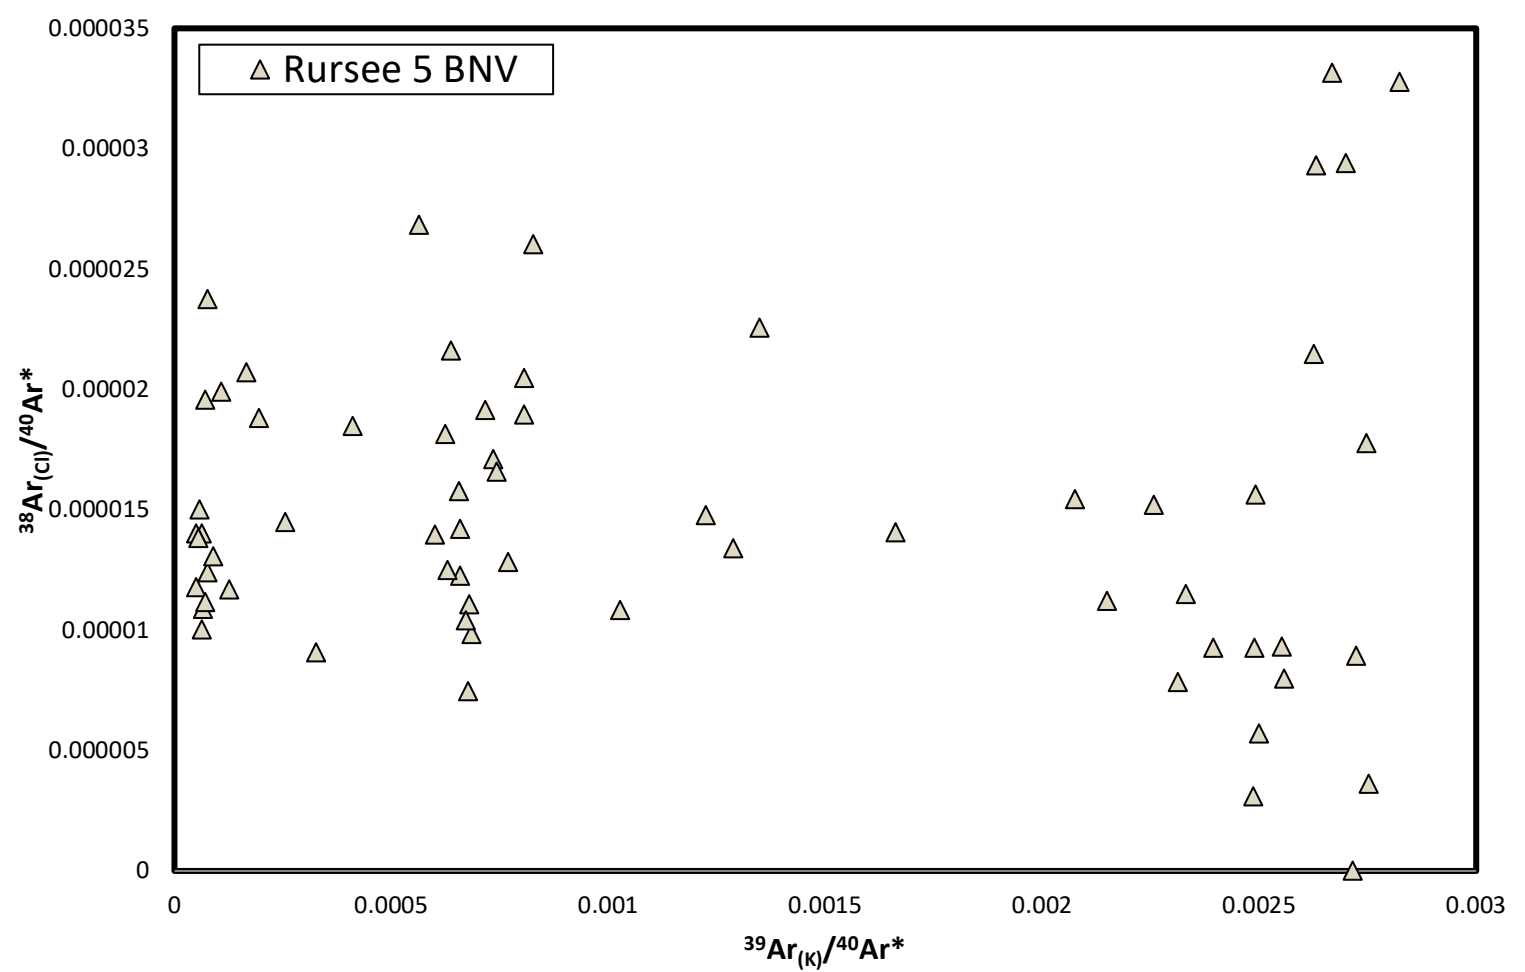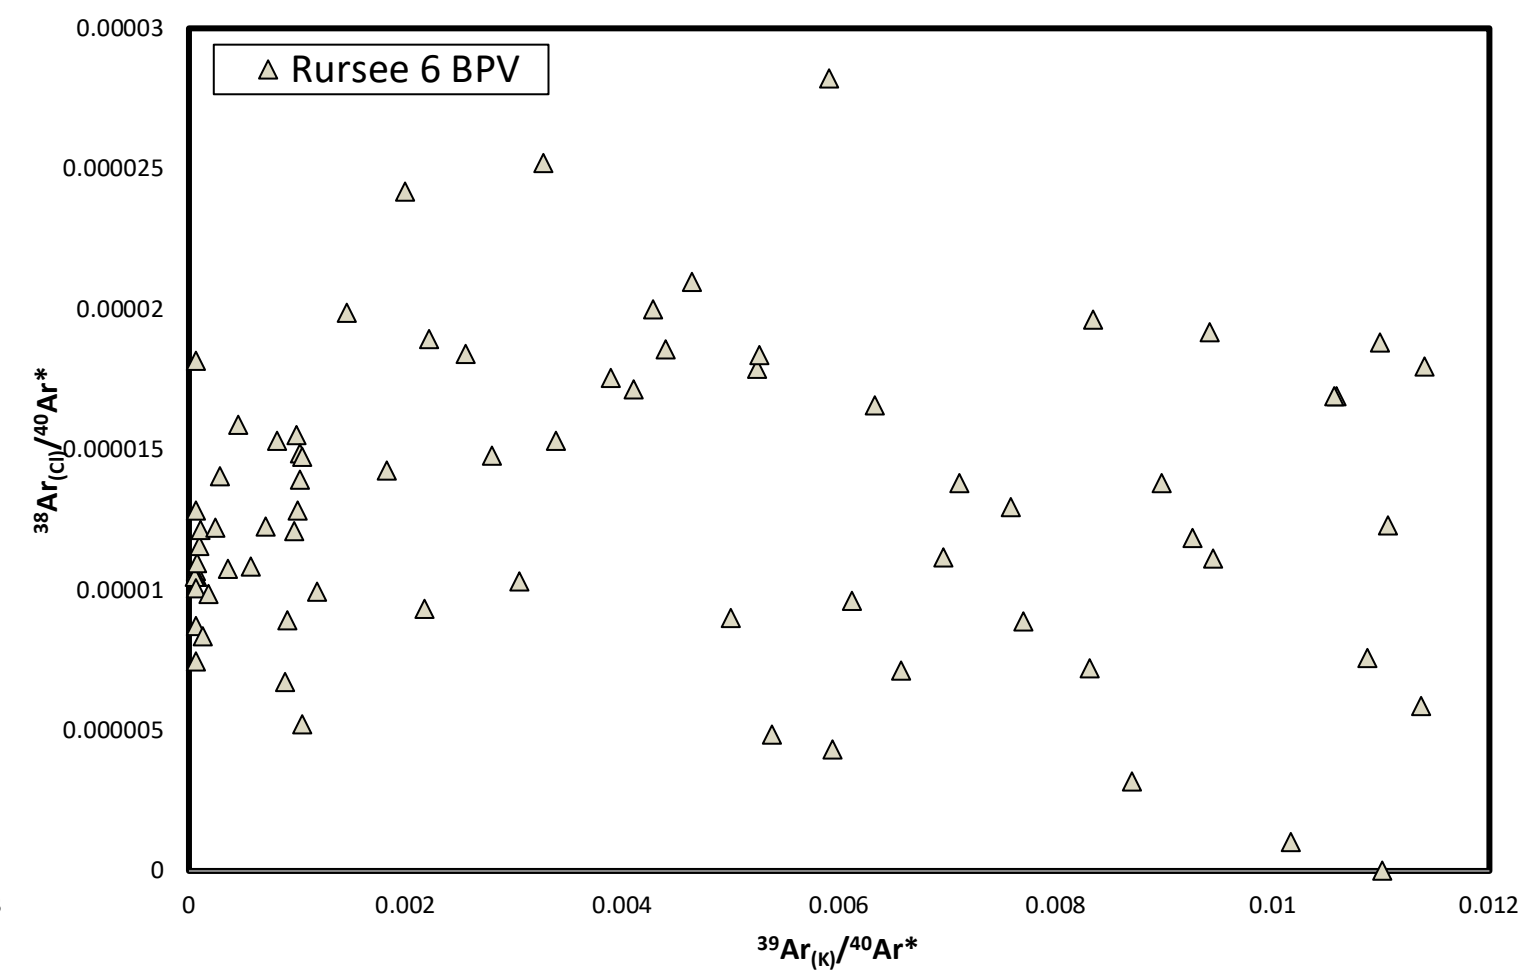

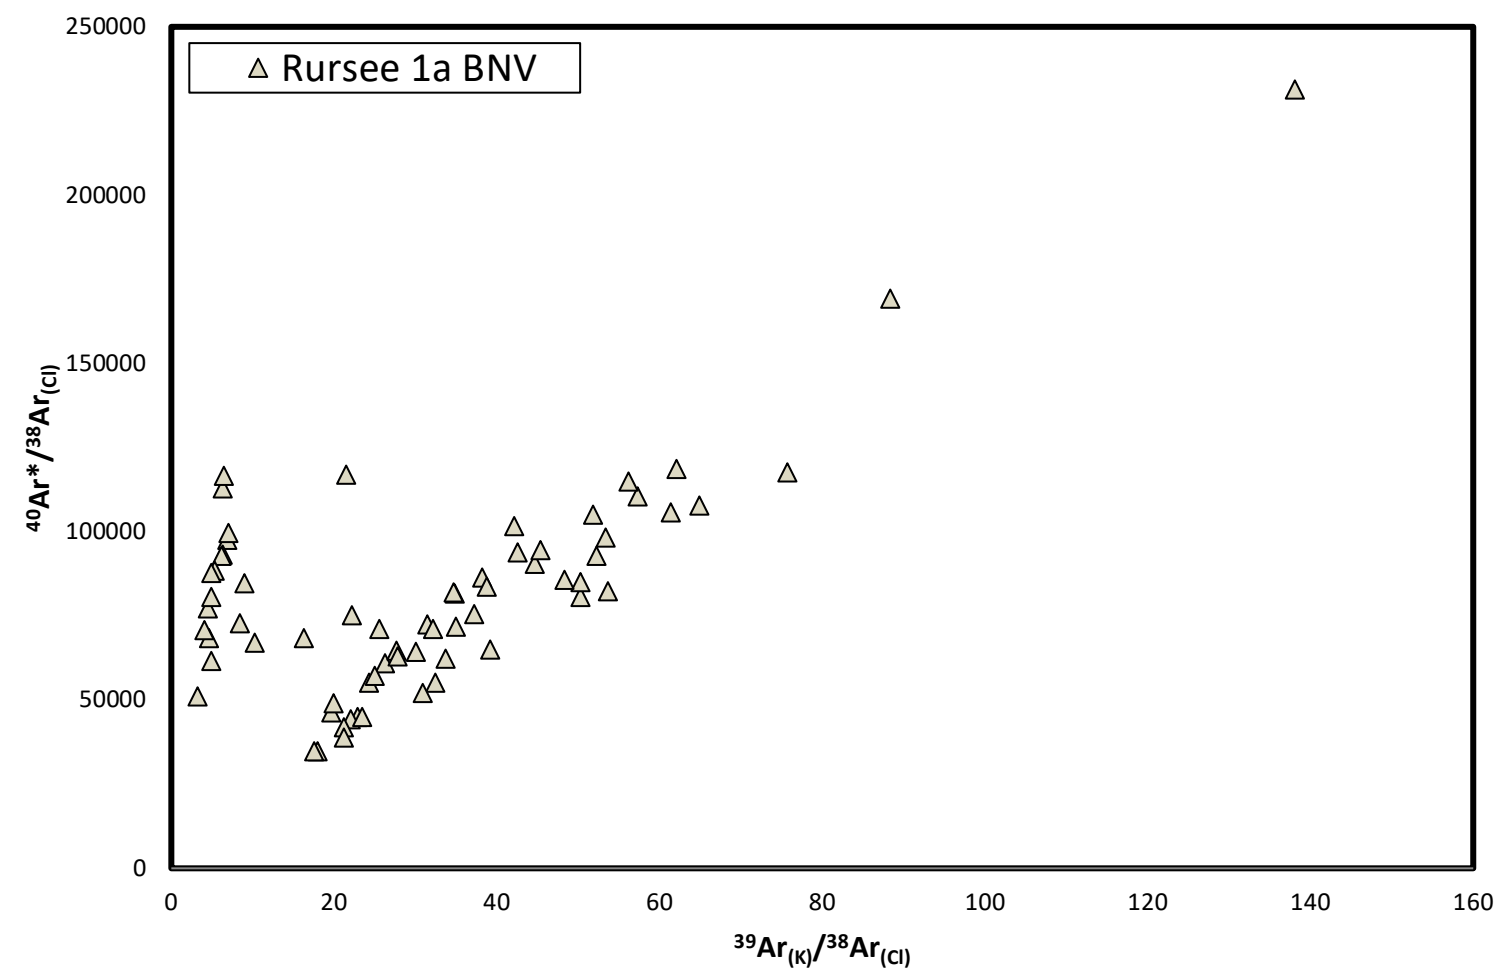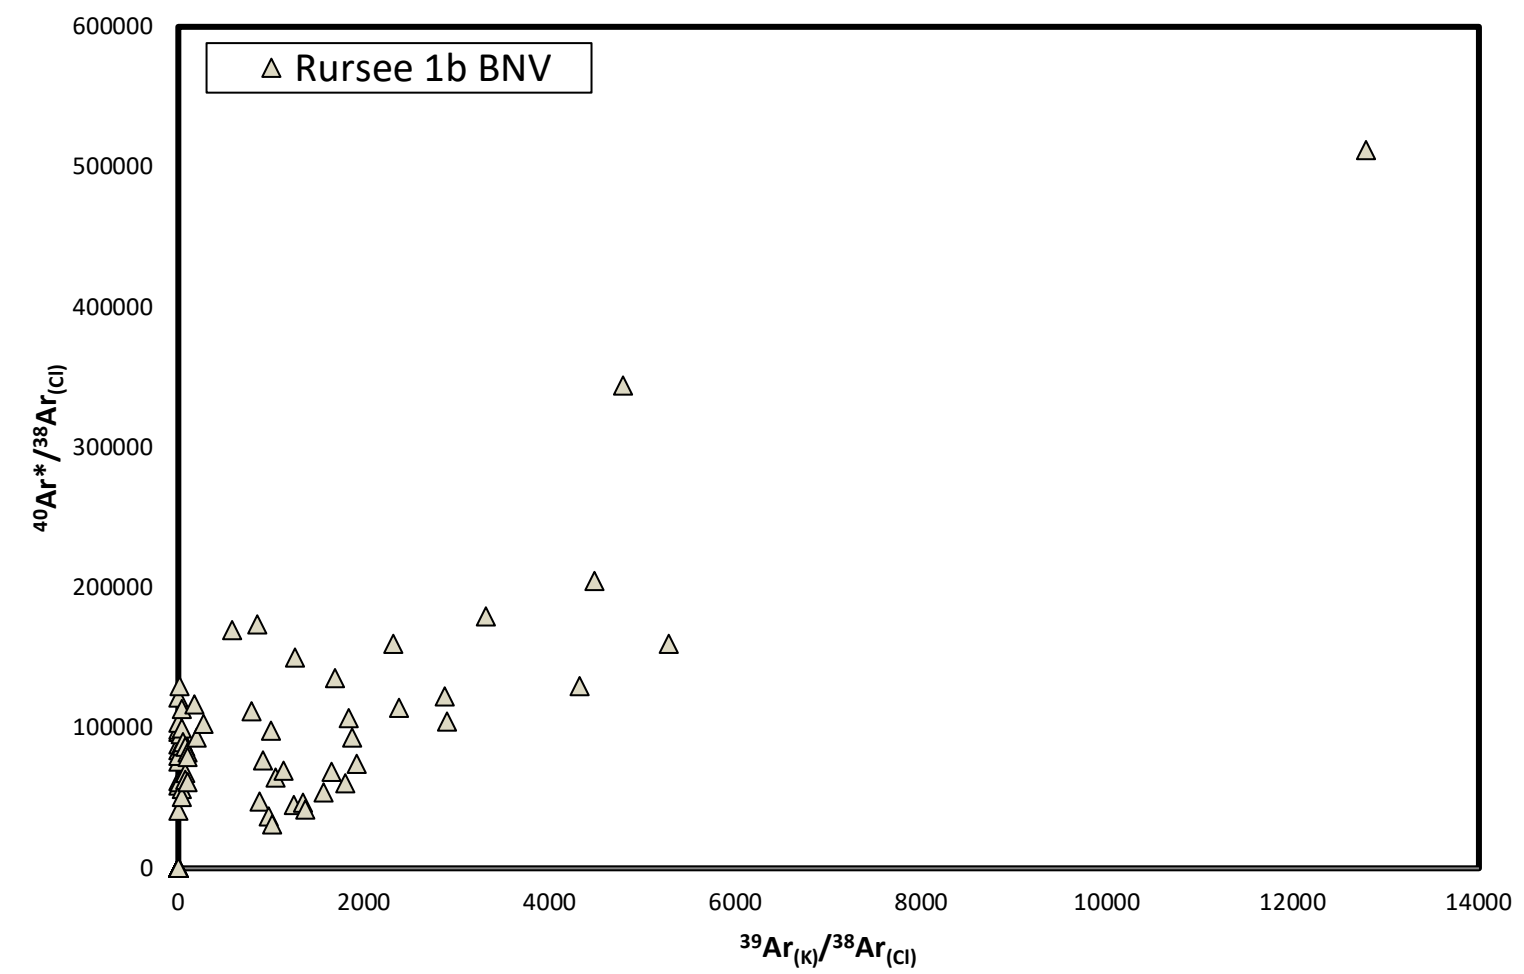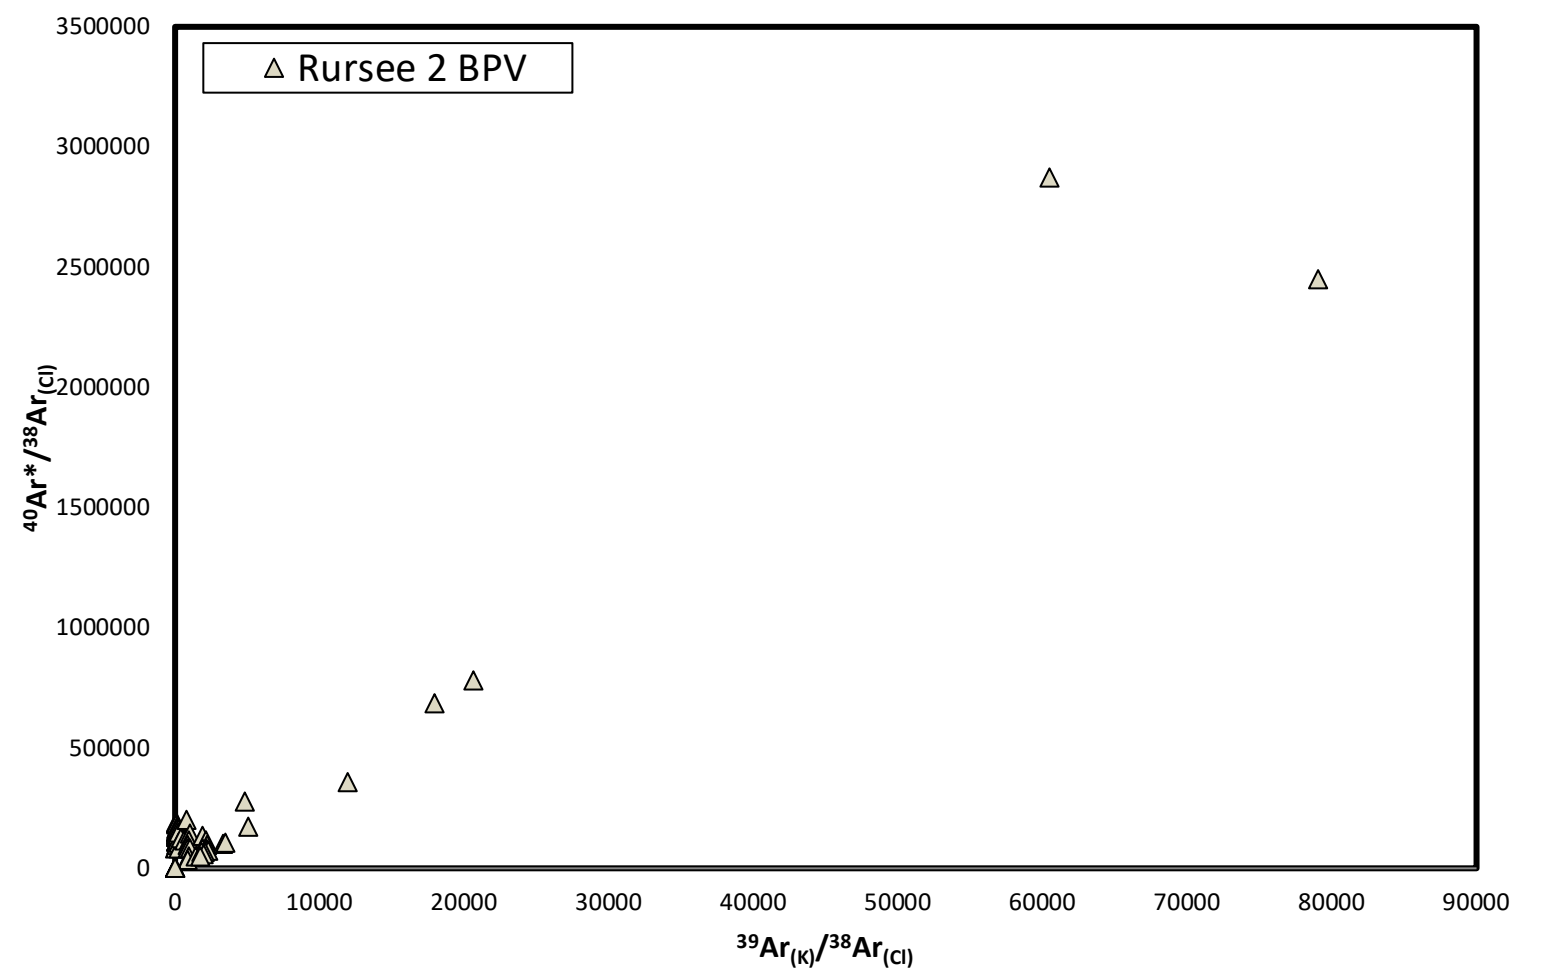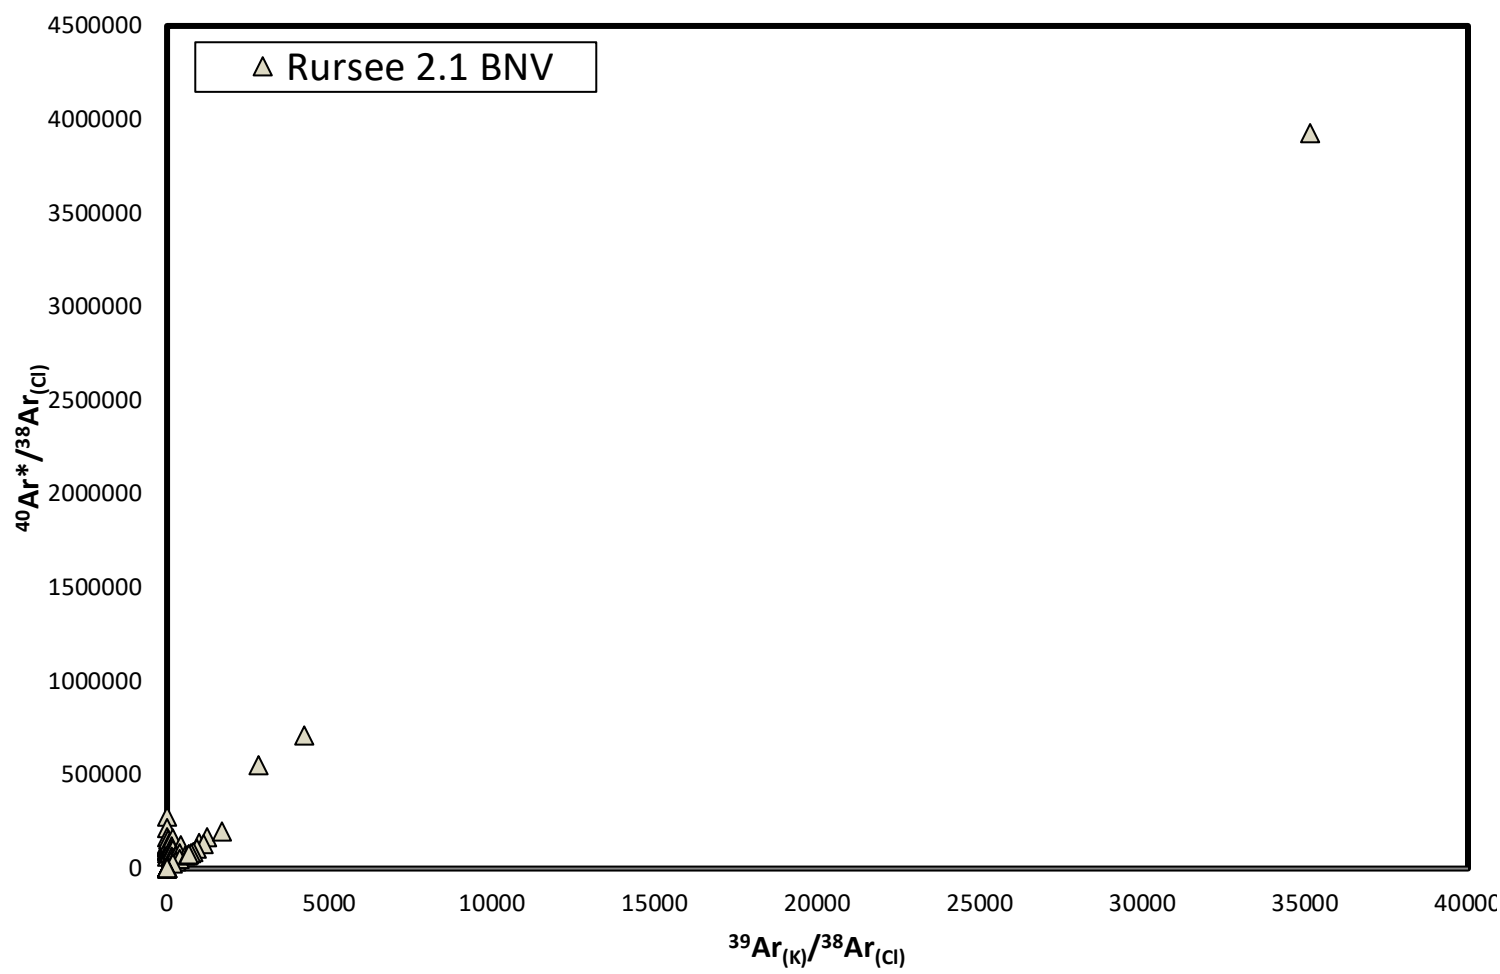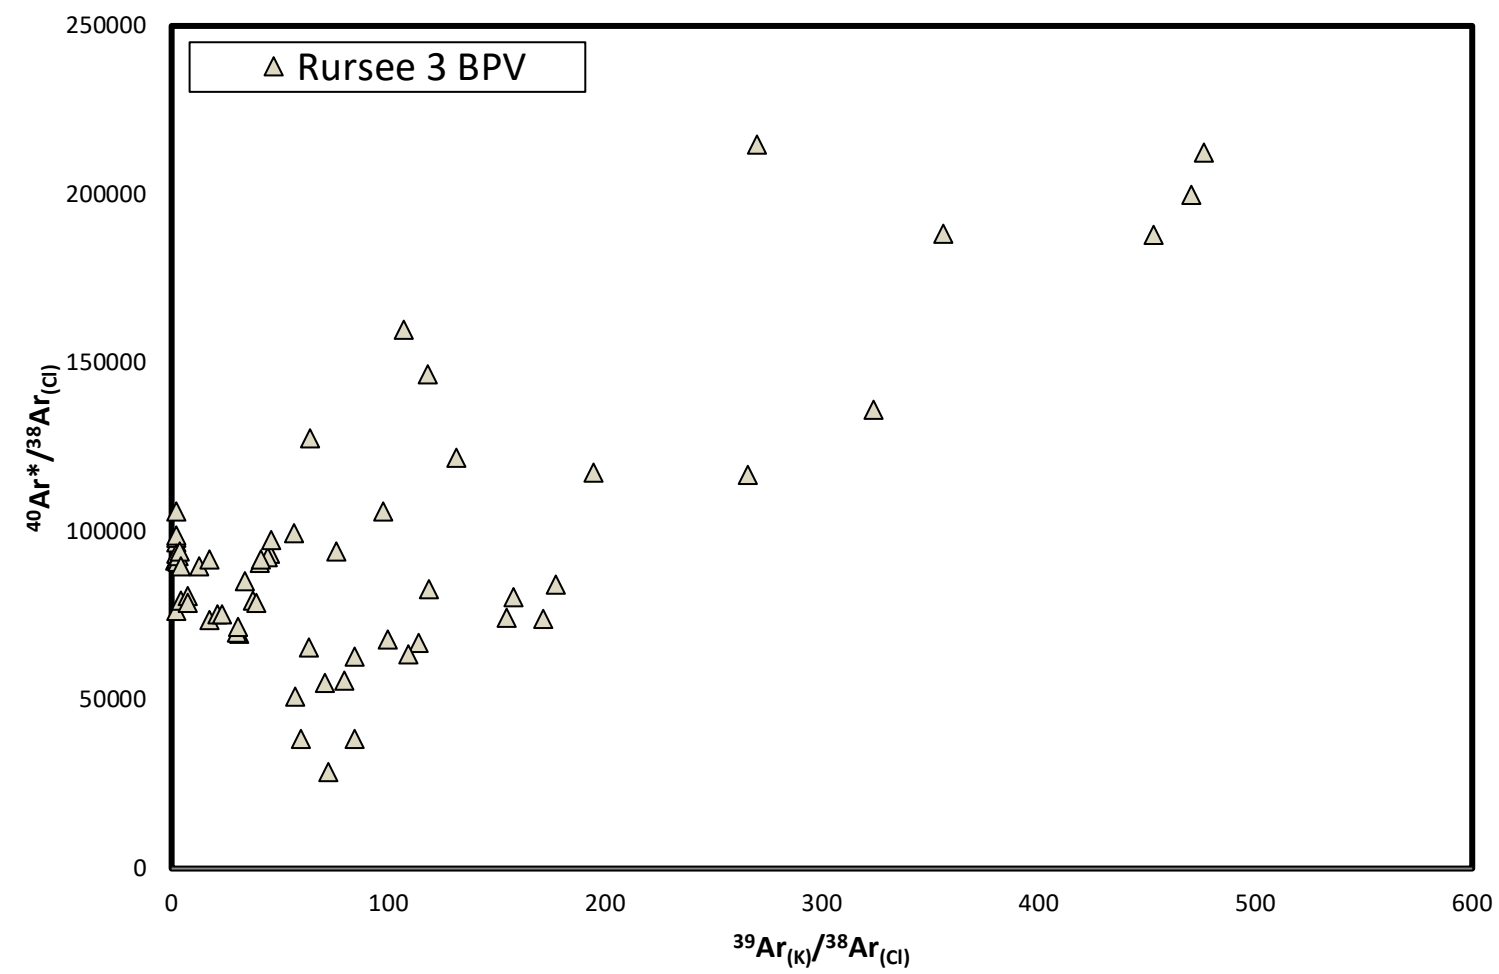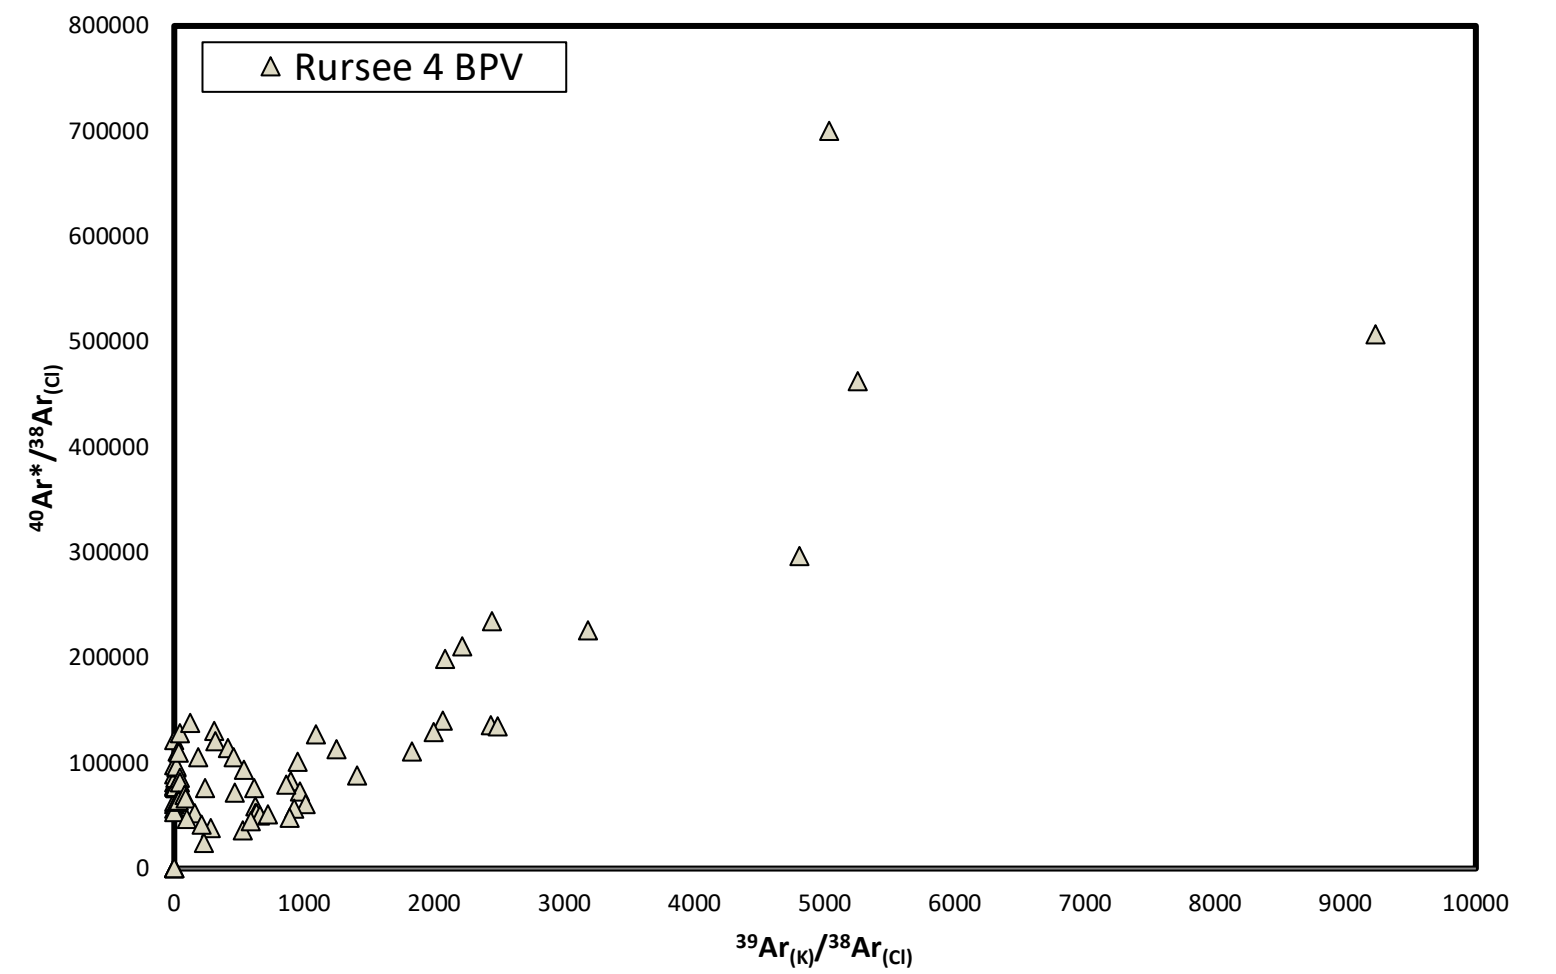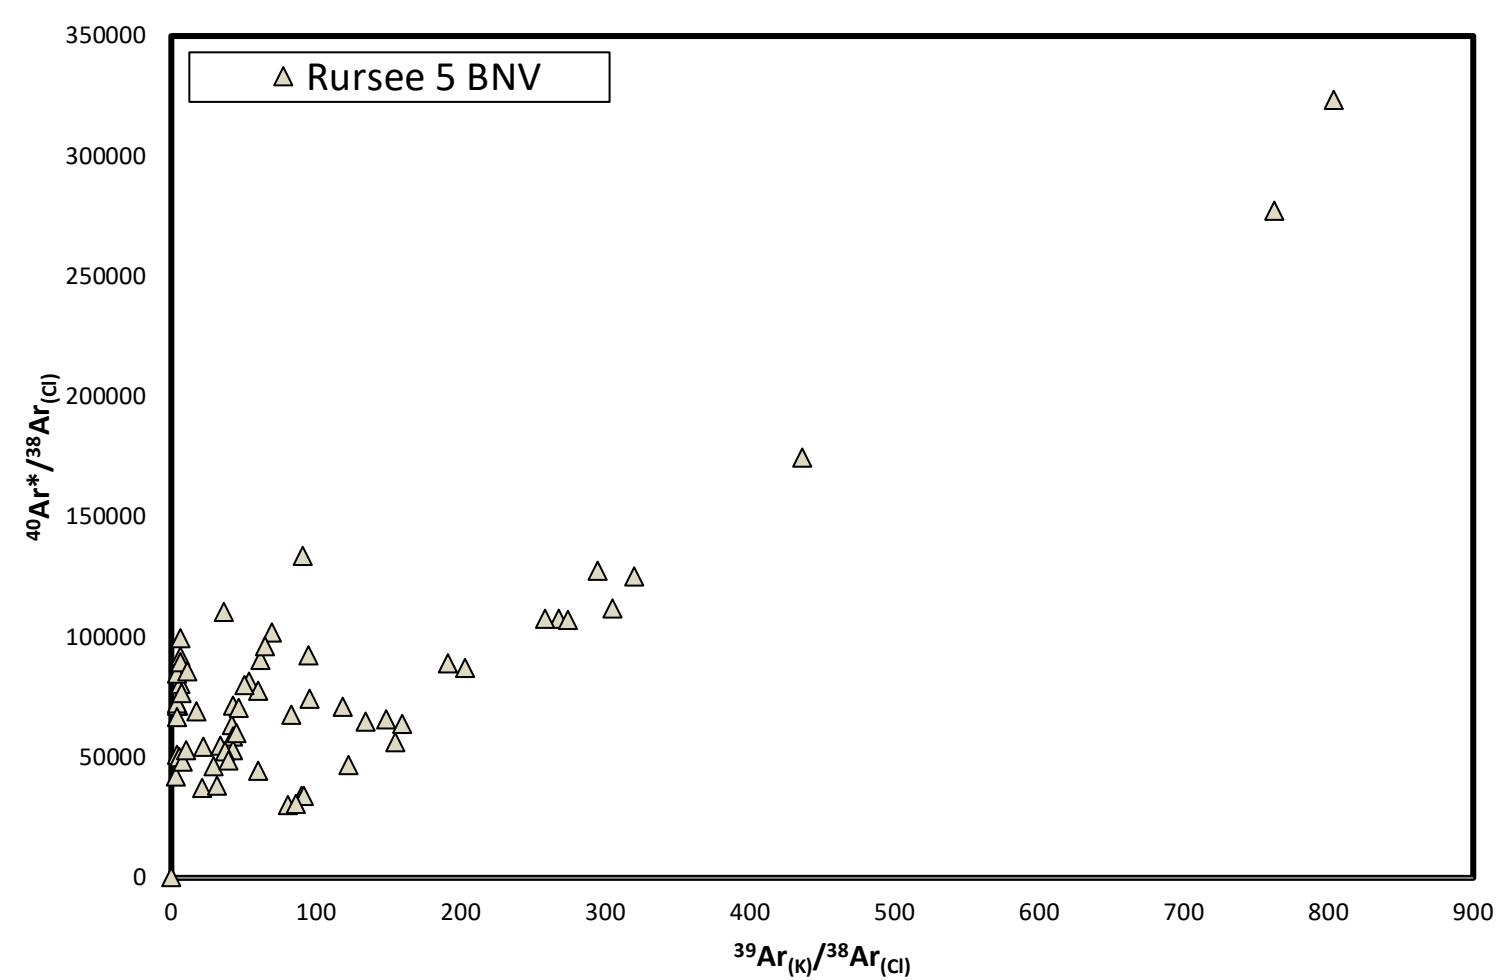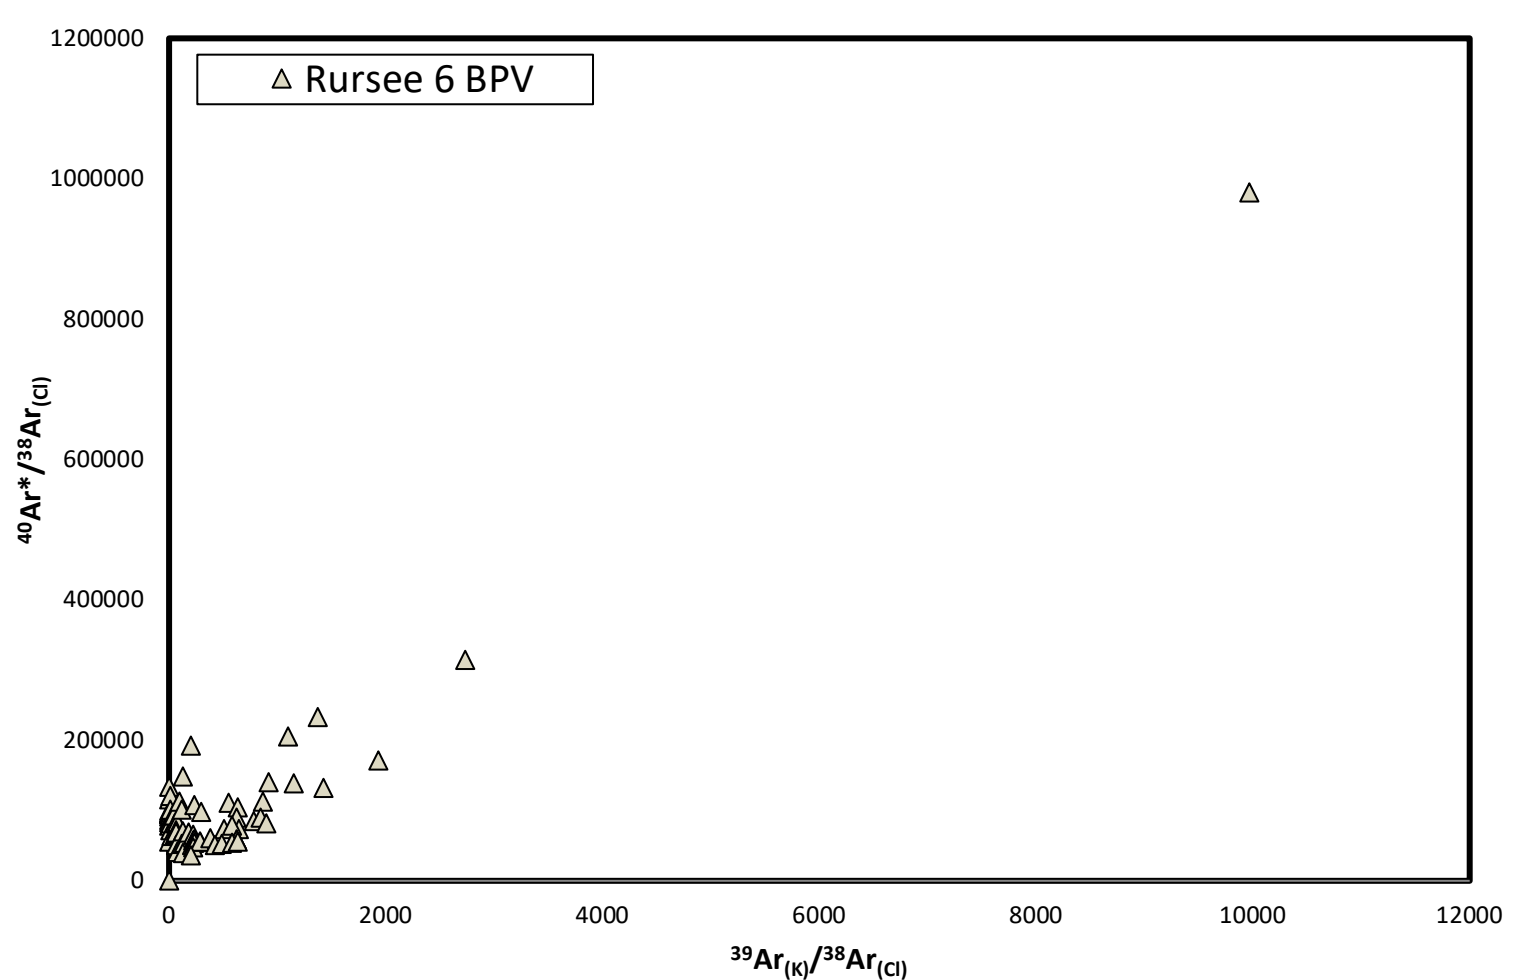

Supplement: Supplementary file [file gchron-2024-35-AC2-supplement.pdf]
